# Supplementary material
Source: Royal Society of Chemistry journal article supplement (doi:10.1039/d6dt00417b)
Supplement: d6dt00417b1.pdf [file d6dt00417b1.pdf]

## *Supporting Information*

# Phosphorescence Properties of Boron $\beta$ -Diketiminate Complexes Modulated by Spiro Structures

Keisuke Suwa,<sup>1</sup> Shunichiro Ito,<sup>1,2</sup> Kazuo Tanaka\*<sup>1,2</sup>

<sup>1</sup> *Department of Polymer Chemistry, Graduate School of Engineering, Kyoto University,*

*Nishikyo-ku, Katsura, Kyoto 615-8510, Japan.*

<sup>2</sup> *Department of Technology and Ecology, Graduate School of Global Environmental*

*Studies, Kyoto University, Katsura, Nishikyo-ku, Kyoto 615-8510, Japan*

E-mail: [tanaka@poly.synchem.kyoto-u.ac.jp](mailto:tanaka@poly.synchem.kyoto-u.ac.jp)

## Table of Contents

|                                                                      |           |
|----------------------------------------------------------------------|-----------|
| <b>1. Experimental Section .....</b>                                 | <b>3</b>  |
| General experimental details .....                                   | 3         |
| Materials .....                                                      | 5         |
| <b>2. Synthetic Procedures and Characterization .....</b>            | <b>6</b>  |
| Synthesis of 4-methyl- <i>N</i> -mesitylbenzenamine (Mes_imine)..... | 6         |
| Synthesis of <i>N</i> -mesitylbenzimidoyl chloride (Mes_Cl) .....    | 6         |
| Synthesis of Mes_L .....                                             | 7         |
| Synthesis of Mes_cat .....                                           | 8         |
| Synthesis of Mes_naph .....                                          | 9         |
| Synthesis of Mes_FL .....                                            | 10        |
| Synthesis of Ph_FL .....                                             | 12        |
| Synthesis of Ph_FLBr .....                                           | 13        |
| <b>3. Photophysical Properties.....</b>                              | <b>16</b> |
| Kinetics of Photophysical Processes .....                            | 17        |
| <b>4. Single Crystal X-ray Analysis.....</b>                         | <b>18</b> |
| <b>5. Powder X-Ray Diffraction.....</b>                              | <b>22</b> |
| <b>6. DFT Calculations .....</b>                                     | <b>23</b> |
| <b>7. NMR Charts.....</b>                                            | <b>47</b> |
| <b>8. References.....</b>                                            | <b>57</b> |

## 1. Experimental Section

### General experimental details

$^1\text{H}$  (400 or 600 MHz) and  $^{13}\text{C}\{^1\text{H}\}$  (100 or 150 MHz) NMR spectra were recorded on JEOL JNM-ECZ400, JNM-ECZ400S, and JNM-ECX400P spectrometers. In  $^1\text{H}$  and  $^{13}\text{C}\{^1\text{H}\}$  NMR spectra, tetramethylsilane (TMS) and/or residual solvent peaks were used as an internal standard. In  $^{11}\text{B}\{^1\text{H}\}$  NMR spectra,  $\text{BF}_3 \cdot \text{OEt}_2$  in a capillary was used as an external standard. High-resolution mass spectrometry (HRMS) was performed at the Technical Support Office (Department of Synthetic Chemistry and Biological Chemistry, Graduate School of Engineering, Kyoto University), and the HRMS spectra were obtained on a Thermo Fisher Scientific EXACTIVE spectrometer for electrospray ionization (ESI) and for direct analysis in real time (DART). UV-vis absorption spectra were recorded on a SHIMADZU UV-3600i Plus spectrophotometer. Fluorescence and phosphorescence (PL) emission spectra and phosphorescence decay were measured with a HORIBA JOBIN YVON Fluorolog-3 spectrofluorometer and Oxford Optistat DN for temperature control. Absolute PL quantum yields were measured with Hamamatsu Photonics Quantaaurus-QY Plus C13534-01. PL lifetimes were measured by a HORIBA FluoroCube spectrofluorometer system and excitation was carried out at 369 nm using a

UV diode laser (NanoLED 369 nm) or a HORIBA DeltaFlex spectrofluorometer system and excitation was carried out at 375 nm using a UV diode laser (DeltaDiode 375 nm)

## Materials

All reactions were performed under nitrogen atmosphere using modified Schlenk line techniques. Compounds **Ph\_L**<sup>1,2</sup> and *N*-(2,4,6-trimethylphenyl)benzamide<sup>3</sup> were synthesized according to the literatures. Column chromatography was performed with Wakogel C-200 SiO<sub>2</sub>. Acetophenone (Tokyo Chemical Industry Co, Ltd.; TCI), aniline (FUJIFILM Wako Pure Chemical Corporation; Wako), benzoyl chloride (TCI), 2,4,6-trimethylaniline (TCI), *p*-toluenesulfonic acid monohydrate (TCI), thionyl chloride (TCI), 1.0 mol/L boron tribromide, dichloromethane solution (Wako), 1.0 mol/L boron trichloride, heptane solution (Sigma-Aldrich), catechol (TCI), 2,3-dihydroxynaphthalene (TCI), 9,9-dimethyl-9*H*-9-silafluorene (TCI), 4,4'-dibromo-2,2'-diiodobiphenyl (BLD pharm), triphenylborane–pyridine complex (TCI), lithium diisopropylamide, in *n*-hexane-tetrahydrofuran, 1.0 mol/L (Kanto Chemical Co., Inc.; Kanto), *n*-butyllithium, in *n*-hexane, 1.6 mol/L (Kanto), deoxygenated toluene (Wako), deoxygenated dichloromethane (Wako) and deoxygenated hexane (Wako) were purchased from the commercial sources and used as received. Diethyl ether (Wako), THF (Wako) and triethylamine (Wako) was purified using two-column solid-state purification system (Glasscontour System, Joerg Meyer, Irvine, CA).

## 2. Synthetic Procedures and Characterization

### Synthesis of 4-methyl-*N*-mesitylbenzenamine (Mes\_imine)

A 300 mL two-neck round bottom flask equipped with a stirring bar, a Dean–Stark apparatus and a reflux condenser was charged with *p*-toluenesulfonic acid monohydrate (2.10 g, 11.0 mmol) at room temperature. After the flask was sealed with a septum and was evacuated and refilled with nitrogen, to the flask was added acetophenone (13.0 mL, 13.4 g, 111.4 mmol), 2,4,6-trimethylaniline (15.5 mL, 14.9 g, 110 mmol) deoxygenated toluene (150 mL) at room temperature. The reaction mixture was stirred at reflux temperature for 1 day, and the flask was cooled to room temperature. Saturated NaHCO<sub>3</sub> aq. was added to the resulting mixture in a separation funnel. The combined organic layer was washed with brine, then dried over anhydrous MgSO<sub>4</sub>. The mixture was filtered, and all volatiles were removed with a rotary evaporator. The obtained oil was purified by bulb-to-bulb distillation using a Buch GKR-50 glass tube oven at 180 °C to give desired product as a brown oil (19.2 g, 73%). <sup>1</sup>H NMR (CDCl<sub>3</sub>): δ 8.04–8.02 (m, 2H), 7.50–7.45 (m, 3H), 6.89 (s, 2H), 2.30 (s, 3H), 2.07 (s, 3H), 2.00 (s, 6H). <sup>13</sup>C {<sup>1</sup>H} NMR (CDCl<sub>3</sub>): δ 165.6, 146.6, 139.4, 132.0, 130.5, 128.6, 128.5, 127.2, 125.7, 20.9, 18.0, 17.5. HRMS (ESI) [M+H]<sup>+</sup>: Found, 238.1589; Calcd., 238.1590.

### Synthesis of *N*-mesitylbenzimidoyl chloride (Mes\_Cl)

A 50 mL two-neck round bottom flask equipped with a stirring bar was charged with *N*-mesitylbenzamide (4.51 g, 18.8 mmol) at room temperature. After the flask was sealed with a septum and was evacuated and refilled with nitrogen, to the flask was added deoxygenated toluene (10.0 mL), and then thionyl chloride (10.0 mL, 16.4 g, 137.9 mmol) at room temperature. The reaction mixture was stirred at 90 °C for 3 h. After the solution was cooled to 70 °C, the solvent and the remaining thionyl chloride were removed by vacuum distillation. Sodium hydrogen carbonate and dichloromethane were added to the residue for neutralization. Precipitates were removed by filtration, and then the solvent was removed by a rotary evaporator to give desired product as a white solid. The product was used for next reaction without further purification.

### **Synthesis of Mes\_L**

A 100 mL two-neck round bottom flask equipped with a stirring bar was charged with 4-methyl-*N*-mesitylbenzenamine (3.13 g, 13.1 mmol) at room temperature. After the flask was sealed with a septum and was evacuated and refilled with nitrogen, to the flask was added deoxygenated Et<sub>2</sub>O (15.0 mL) at room temperature, and then lithium diisopropylamide (15.0 mL, 15.0 mmol) at -78 °C over 10 min. The reaction mixture was stirred at room temperature for 3 h, and then *N*-mesitylbenzimidoyl chloride (3.49 g, 13.6 mmol) in deoxygenated Et<sub>2</sub>O (20.0 mL) was added to the solution at -78 °C. After stirred

the solution at room temperature for 15 h, the solution was poured into a large amount of chloroform. Saturated NaHCO<sub>3</sub> aq. was added to the resulting mixture in a separation funnel. The combined organic layer was washed with brine, then dried over anhydrous Na<sub>2</sub>SO<sub>4</sub>. The mixture was filtered, and all volatiles were removed with a rotary evaporator. The resulting mixture was diluted with a small amount of chloroform and poured into an excess amount of methanol at room temperature, and the precipitate was dried in vacuum to afford the titled compound as a yellow powder (1.81 g, 30%). <sup>1</sup>H NMR (CDCl<sub>3</sub>): δ 12.72 (s, 1H), 7.30–7.27 (m, 4H), 7.22–7.15 (m, 6H), 5.33 (s, 1H), 2.17 (s, 6H), 2.12 (s, 12H). <sup>13</sup>C{<sup>1</sup>H} NMR (CDCl<sub>3</sub>): δ 162.7, 141.1, 139.0, 133.1, 131.0, 128.5, 128.3, 127.6, 127.6, 96.9, 20.7, 18.8. HRMS (ESI) [M+H]<sup>+</sup>: Found, 459.2789; Calcd., 459.2795.

### Synthesis of Mes\_cat

A two-neck test tube equipped with a stirring bar was charged with Mes\_FL (0.050 g, 0.11 mmol) at room temperature. After the flask was sealed with a septum and was evacuated and refilled with nitrogen, to the flask was added deoxygenated dichloromethane (1.0 mL) and then boron tribromide (0.15 mL, 0.15 mmol) at room temperature. The reaction mixture was stirred at room temperature for 1 day, and then catechol (0.014 g, 0.16 mmol) in deoxygenated toluene (7.0 mL) was added to the

solution at room temperature. After stirred the solution at room temperature for 1 day, the solvent was removed with a vacuum pump. The precipitate was diluted with toluene, then the mixture was filtered, and all volatiles were removed with a rotary evaporator. The obtained residue was diluted with a small amount of dichloromethane and poured into an excess amount of ethanol at  $-78\text{ }^{\circ}\text{C}$ . The precipitate was dried in vacuum to afford the titled compound as a pale yellow powder (1.6 mg, 3.2%).  $^1\text{H}$  NMR ( $\text{CD}_2\text{Cl}_2$ ):  $\delta$  7.30–7.19 (m, 10H), 6.61 (s, 4H), 6.31–6.22 (m, 4H), 5.59 (s, 1H), 2.29 (s, 12H), 2.07 (s, 6H).  $^{13}\text{C}\{^1\text{H}\}$  NMR ( $\text{CD}_2\text{Cl}_2$ ):  $\delta$  164.7, 151.3, 137.5, 136.6, 136.1, 135.6, 129.2, 128.4, 127.6, 127.6, 118.0, 107.3, 98.6, 20.5, 19.1.  $^{11}\text{B}\{^1\text{H}\}$  NMR (128 MHz,  $\text{CD}_2\text{Cl}_2$ ):  $\delta$  8.45. HRMS (ESI)  $[\text{M}+\text{Na}]^+$ : Found, 599.2847; Calcd., 599.2840.

### Synthesis of Mes\_naph

A 100 mL Schlenk flask equipped with a stirring bar was charged with **Mes\_FL** (0.49 g, 1.06 mmol) at room temperature. After the flask was evacuated and refilled with nitrogen, to the flask was added deoxygenated dichloromethane (10.0 mL) and then boron tribromide (1.5 mL, 1.5 mmol) at room temperature. The reaction mixture was stirred at room temperature for 1 day, and then 2,3-dihydroxynaphthalene (0.26 g, 1.65 mmol) suspended in deoxygenated toluene (40.0 mL) was added to the solution at room

temperature. After stirred the solution at room temperature for 12 hours, the solvent was removed with a vacuum pump. The precipitate was diluted with toluene, then the mixture was filtered, and all volatiles were removed with a rotary evaporator. The obtained residue was diluted with a small amount of chloroform and poured into an excess amount of ethanol at  $-78\text{ }^{\circ}\text{C}$ . The precipitate was diluted with a small amount of dichloromethane and poured into an excess amount of hexane at room temperature, and then dried in vacuum to afford the titled compound as a pale yellow powder (0.048 g, 7.0%).  $^1\text{H}$  NMR ( $\text{CD}_2\text{Cl}_2$ ):  $\delta$  7.33–7.21 (m, 12H), 7.05–7.04 (m, 2H), 6.59 (s, 4H), 6.52 (s, 2H), 5.64 (s, 1H), 2.33 (s, 12H), 2.01 (s, 6H).  $^{13}\text{C}\{^1\text{H}\}$  NMR ( $\text{CD}_2\text{Cl}_2$ ):  $\delta$  165.4, 152.5, 137.4, 136.8, 136.6, 135.9, 130.1, 129.6, 128.8, 128.0, 128.0, 126.2, 122.3, 101.9, 99.0, 20.8, 19.4.  $^{11}\text{B}\{^1\text{H}\}$  NMR (128 MHz,  $\text{CD}_2\text{Cl}_2$ ):  $\delta$  8.54. HRMS (ESI)  $[\text{M}+\text{Na}]^+$ : Found, 649.3001; Calcd., 649.2997.

### Synthesis of Mes\_FL

A 50 mL two-neck round bottom flask equipped with a stirring bar was charged with 9,9-dimethyl-9*H*-9-ssilafluorene (0.35 g, 1.66 mmol), at room temperature. After the flask was evacuated and refilled with nitrogen, to the flask was added boron tribromide (5.0 mL, 5.0 mmol) at room temperature. The reaction mixture was stirred at  $50\text{ }^{\circ}\text{C}$  for 2 days, and then volatiles were removed with a vacuum pump. The residue containing 9-

bromo-9-borafluorene was used for the next reaction without further purification. Another 50 mL two-neck round bottom flask equipped with a stirring bar was charged with **Mes\_L** (0.50 g, 1.09 mmol) at room temperature. After the flask was evacuated and refilled with nitrogen, deoxygenated hexane (15.0 mL) was added to the flask at room temperature, and then *n*-butyllithium (0.75 mL, 1.20 mmol) was added at  $-78\text{ }^{\circ}\text{C}$ . The reaction mixture was stirred at room temperature for 2 hours, and then the solvent was exchanged from hexane to toluene (10 mL). The toluene solution was added slowly at  $-78\text{ }^{\circ}\text{C}$  for 10 minutes to the solution of precursor 9-bromo-9-borafluorene in toluene (10 mL). After warmed up to room temperature, the mixture was stirred for 40 h. After the reaction solution was quenched with methanol, volatiles were removed with a rotary evaporator. The resulting mixture was purified by silica gel column chromatography with hexane/ethyl acetate = 10/1 as an eluent. Recrystallization from dichloromethane / hexane gave a yellow crystal (0.14 g, 20%).  $^1\text{H}$  NMR (DMSO- $d_6$ ,  $90\text{ }^{\circ}\text{C}$ ):  $\delta$  7.39–7.34 (m, 8H), 7.27 (tt,  $J = 1.24, 1.98\text{ Hz}$ , 2H), 7.22 (m, 4H), 6.98 (ddd,  $J = 0.82, 6.60\text{ Hz}$ , 2H), 6.71 (t,  $J = 7.15\text{ Hz}$ , 2H), 6.38 (s, 4H), 5.77 (s, 1H), 1.93 (s, 6H), 1.86 (bs, 12H).  $^{13}\text{C}\{^1\text{H}\}$  NMR (DMSO- $d_6$ ,  $90\text{ }^{\circ}\text{C}$ ):  $\delta$  166.2, 147.8, 140.4, 136.9, 134.0, 133.8, 130.3, 129.1, 127.9, 127.4, 127.2, 126.7, 125.1, 117.9, 102.6, 19.5, 19.3. (The signals assigned to the carbons bound to boron were not detected due to the quadrupolar feature of the boron nuclei.)  $^{11}\text{B}\{^1\text{H}\}$

NMR (128 MHz, CD<sub>2</sub>Cl<sub>2</sub>):  $\delta$  3.24. HRMS (ESI) [M+Na]<sup>+</sup>: Found, 643.3261; Calcd., 643.3255.

### Synthesis of Ph\_FL

A 30 mL Schlenk flask equipped with a stirring bar was charged with 9,9-dimethyl-9H-9-silafluorene (0.21 g, 1.0 mmol). After the flask was evacuated and refilled with nitrogen, to the flask was added boron tribromide (3.0 mL, 3.0 mmol) at room temperature. The reaction mixture was stirred at 50 °C for 2 days, and then volatiles were removed with a vacuum pump. The residue containing 9-bromo-9-borafluorene was used for the next reaction without further purification. A 30 mL two-neck round bottom flask equipped with a stirring bar was charged with **Ph\_L** (0.25 g, 0.67 mmol), at room temperature. After the flask was evacuated and refilled with nitrogen, to the flask was added deoxygenated hexane (15 mL) at room temperature and then *n*-butyllithium (0.50 mL, 0.80 mmol) at -78 °C. The reaction mixture was stirred at room temperature for 2 hours, and then the solvent was exchanged from hexane to deoxygenated toluene (10 mL). The toluene solution was added slowly at -78 °C for 10 minutes to the solution of precursor 9-bromo-9-borafluorene in deoxygenated toluene (5.0 mL). After warmed up

to room temperature, the mixture was stirred for 1 day. After the reaction solution was quenched with methanol, the precipitate was diluted with dichloromethane, then the mixture was filtered, and all volatiles were removed with a rotary evaporator. volatiles were removed with a rotary evaporator. The resulting mixture was purified by silica gel column chromatography with hexane/ethyl acetate = 10/1 as an eluent. Recrystallization from dichloromethane / hexane gave an orange crystal (0.018 g, 5.0%).  $^1\text{H}$  NMR ( $\text{CDCl}_3$ ):  $\delta$  7.51 (d,  $J = 7.67$  Hz, 2H), 7.37 (d,  $J = 7.13$  Hz, 2H), 7.36–7.33 (m, 4H), 7.23–7.16 (m, 6H), 7.10 (ddd,  $J = 1.10, 7.40$  Hz, 2H), 6.82 (ddd,  $J = 1.10, 7.40$  Hz, 2H), 6.73–6.69 (m, 6H), 6.61–6.57 (m, 4H), 5.66 (s, 1H).  $^{13}\text{C}\{^1\text{H}\}$  NMR ( $\text{CDCl}_3$ ):  $\delta$  165.7, 148.1, 145.0, 137.9, 131.4, 129.3, 129.0, 127.9, 127.5, 127.1, 127.0, 126.1, 125.1, 118.8, 101.6. (The signals assigned to the carbons bound to boron were not detected due to the quadrupolar feature of the boron nuclei.)  $^{11}\text{B}\{^1\text{H}\}$  NMR (128 MHz,  $\text{CD}_2\text{Cl}_2$ ):  $\delta$  3.02. HRMS (ESI)  $[\text{M}+\text{H}]^+$ : Found, 537.2504; Calcd., 537.2497.

### Synthesis of Ph\_FLBr

A 30 mL Schlenk flask equipped with a stirring bar was charged with 4,4'-dibromo-2,2'-diiodobiphenyl (0.22 g, 0.40 mmol), at room temperature. After the flask was evacuated and refilled with nitrogen, to the flask was added deoxygenated  $\text{Et}_2\text{O}$  (7.0 mL) at room temperature and then *n*-butyllithium (0.77 mL, 1.2 mmol) slowly at  $-78$  °C for 7

minutes. After the reaction mixture was stirred at  $-78\text{ }^{\circ}\text{C}$  for 1.5 h, the solvent was exchanged from  $\text{Et}_2\text{O}$  to deoxygenated hexane (7.0 mL) and then the flask was added boron trichloride (0.50 mL, 0.50 mmol) slowly at  $-78\text{ }^{\circ}\text{C}$  for 10 minutes. The residue containing 2,7-dibromo-9-chloro-9-borafluorene was used for the next reaction without further purification. A 30 mL two-neck round bottom flask equipped with a stirring bar was charged with **Ph\_L** (0.10 g, 0.27 mmol). After the flask was evacuated and refilled with nitrogen, to the flask was added deoxygenated hexane (7.0 mL) at room temperature and then *n*-butyllithium (0.18 mL, 0.29 mmol) at  $-78\text{ }^{\circ}\text{C}$ . The reaction mixture was stirred at  $-78\text{ }^{\circ}\text{C}$  for 4 hours, and then the solvent was exchanged from hexane to deoxygenated toluene (7.0 mL). The toluene solution was added slowly at  $-78\text{ }^{\circ}\text{C}$  for 5 minutes to the solution of precursor 2,7-dibromo-9-chloro-9-borafluorene in deoxygenated toluene (10 mL). After warmed up to room temperature, the mixture was stirred for 20 h. After the reaction solution was quenched with water, the solution was poured into a large amount of chloroform. The combined organic layer was washed with brine, then dried over anhydrous  $\text{Na}_2\text{SO}_4$ . The mixture was filtered, and all volatiles were removed with a rotary evaporator. The residue was purified by silica gel column chromatography with hexane/ethyl acetate = 10/1 as an eluent. Recrystallization from chloroform / hexane gave a yellow crystal (4.3 mg, 2.4%).  $^1\text{H}$  NMR ( $\text{CD}_2\text{Cl}_2$ ):  $\delta$  7.53 (d, 2H), 7.37–7.32 (m, 6H),

7.27–7.19 (m, 8H), 6.81–6.77 (m, 6H), 6.61–6.59 (m, 4H), 5.64 (s, 1H).  $^{13}\text{C}\{^1\text{H}\}$  NMR ( $\text{CD}_2\text{Cl}_2$ ):  $\delta$  166.5, 146.1, 144.9, 137.8, 134.5, 130.4, 129.6, 129.6, 128.3, 127.8, 127.8, 125.9, 121.2, 121.1, 101.4. (The signals assigned to the carbons bound to boron were not detected due to the quadrupolar feature of the boron nuclei.)  $^{11}\text{B}$  NMR (128 MHz,  $\text{CD}_2\text{Cl}_2$ ):  $\delta$  2.31. HRMS (ESI)  $[\text{M}+\text{H}]^+$ : Found, 693.0725; Calcd., 693.0707.

### 3. Photophysical Properties

**Table S1.** Fluorescence lifetimes of the biphenylene complexes<sup>a</sup>

|                   |                | $\tau_1$ / ns | $f_1$ | $\tau_2$ / ns  | $f_2$          | $\tau_3$ / ns  | $f_3$          | $\langle\tau\rangle$ / ns <sup>b</sup> |
|-------------------|----------------|---------------|-------|----------------|----------------|----------------|----------------|----------------------------------------|
| crystal,<br>r.t.  | <b>Mes_FL</b>  | 0.27          | 1     | – <sup>c</sup> | – <sup>c</sup> | – <sup>c</sup> | – <sup>c</sup> | 0.27                                   |
|                   | <b>Ph_FL</b>   | 0.64          | 0.31  | 1.18           | 0.69           | – <sup>c</sup> | – <sup>c</sup> | 1.0                                    |
|                   | <b>Ph_FLBr</b> | 1.59          | 0.54  | 4.61           | 0.46           | – <sup>c</sup> | – <sup>c</sup> | 3.0                                    |
| solution,<br>77 K | <b>Mes_FL</b>  | 0.22          | 0.35  | 4.49           | 0.34           | 8.47           | 0.31           | 4.2                                    |
|                   | <b>Ph_FL</b>   | 5.78          | 0.59  | 0.60           | 0.38           | 38.3           | 0.03           | 4.8                                    |
|                   | <b>Ph_FLBr</b> | 0.42          | 0.79  | 2.54           | 0.13           | 8.54           | 0.08           | 1.35                                   |

<sup>a</sup> $f_i = \alpha_i\tau_i / \sum\alpha_i\tau_i$ . <sup>b</sup> $\langle\tau\rangle = \sum\alpha_i\tau_i^2 / \sum\alpha_i\tau_i = \sum f_i\tau_i$ . <sup>c</sup>Not determined.

**Table S2.** Phosphorescence lifetimes of the complexes

|                 |      | $\tau_{\text{phos}}$ / ms |                |
|-----------------|------|---------------------------|----------------|
|                 |      | solution, 77 K            | crystal, r.t.  |
| <b>Mes_FL</b>   | 21.5 | – <sup>a</sup>            | – <sup>a</sup> |
| <b>Ph_FL</b>    | 30.5 | – <sup>a</sup>            | – <sup>a</sup> |
| <b>Ph_FLBr</b>  | 63.4 | 2.1                       | – <sup>a</sup> |
| <b>Mes_cat</b>  | 117  | – <sup>a</sup>            | – <sup>a</sup> |
| <b>Mes_naph</b> | 140  | – <sup>a</sup>            | – <sup>a</sup> |

<sup>a</sup>Not determined.

## Kinetics of Photophysical Processes

**Table S3.** Rate constants of the biphenylene complexes

|                | Crystalline state at r.t.             |                                       | Frozen state at 77 K <sup>a</sup>     |                                       |
|----------------|---------------------------------------|---------------------------------------|---------------------------------------|---------------------------------------|
|                | $k_{\text{FL}} / 10^7 \text{ s}^{-1}$ | $k_{\text{nr}} / 10^7 \text{ s}^{-1}$ | $k_{\text{FL}} / 10^7 \text{ s}^{-1}$ | $k_{\text{nr}} / 10^7 \text{ s}^{-1}$ |
| <b>Mes_FL</b>  | 5.7                                   | 36                                    | 8.3                                   | 15                                    |
| <b>Ph_FL</b>   | 8.8                                   | 5.8                                   | 8.6                                   | 12                                    |
| <b>Ph_FLBr</b> | 12                                    | 0.93                                  | 54                                    | 20                                    |

<sup>a</sup>In 2MeTHF ( $1 \times 10^{-5}$  M). <sup>c</sup> $k_{\text{FL}}$  and  $k_{\text{nr}}$  were determined from the following formula:  $k_{\text{r}} =$

$$\Phi_{\text{PL}} / \langle \tau \rangle \text{ and } k_{\text{nr}} = (1 - \Phi_{\text{PL}}) / \langle \tau \rangle.$$

#### 4. Single Crystal X-ray Analysis

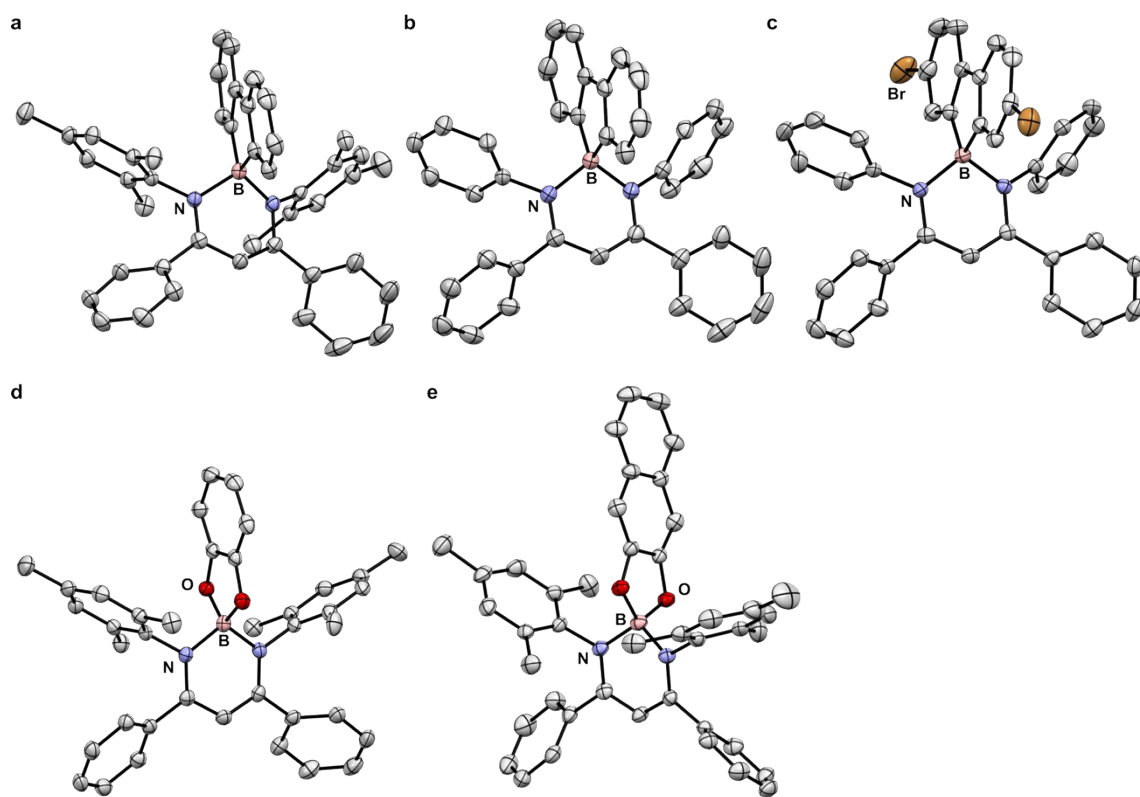

**Figure S1.** Single crystal X-ray structures of (a) **Mes\_FL**, (b) **Ph\_FL**, (c) **Ph\_FLBr**, (d) **Mes\_cat**, and (e) **Mes\_naph**. Crystal solvents and hydrogen atoms were omitted for clarity. Legend: white, C; pale pink, B; blue, N; red, O; brown, Br. Ellipsoid: 50% of probability.

**Table S4.** Selected X-ray data, collection, and refinement parameters for biphenylene

complexes

| Crystal data                                                                | Mes_FL                                                                               | Ph_FL                                           | Ph_FLBr                                                                             |
|-----------------------------------------------------------------------------|--------------------------------------------------------------------------------------|-------------------------------------------------|-------------------------------------------------------------------------------------|
| CCDC Deposition No.                                                         | 2529534                                                                              | 2529535                                         | 2529536                                                                             |
| Chemical formula                                                            | C <sub>45</sub> H <sub>41</sub> BN <sub>2</sub> · 0.5 C <sub>6</sub> H <sub>14</sub> | C <sub>39</sub> H <sub>29</sub> BN <sub>2</sub> | C <sub>39</sub> H <sub>27</sub> BN <sub>2</sub> Br <sub>2</sub> · CHCl <sub>3</sub> |
| $M_r$                                                                       | 1325.37                                                                              | 536.45                                          | 813.62                                                                              |
| Crystal system,<br>Space group                                              | Orthorhombic, $P2_12_12_1$                                                           | Orthorhombic,<br>$P2_12_12_1$                   | Monoclinic, $P2_1/c$                                                                |
| Temperature (K)                                                             | 150                                                                                  | 150                                             | 150                                                                                 |
| $a, b, c$ (Å)                                                               | 14.271(3),<br>15.990(3),<br>33.520(6)                                                | 9.777(3),<br>13.268(4),<br>22.685(7)            | 12.034(4),<br>9.965(3),<br>29.552(8)                                                |
| $\alpha, \beta, \gamma$ (deg)                                               | 90, 90, 90                                                                           | 90, 90, 90                                      | 90, 94.320(5), 90                                                                   |
| $V$ (Å <sup>3</sup> )                                                       | 7649(2)                                                                              | 2942.8(15)                                      | 3533.7(17)                                                                          |
| $Z$                                                                         | 4                                                                                    | 4                                               | 4                                                                                   |
| Radiation type                                                              | Mo $K\alpha$                                                                         | Mo $K\alpha$                                    | Mo $K\alpha$                                                                        |
| $\mu$ (mm <sup>-1</sup> )                                                   | 0.066                                                                                | 0.070                                           | 2.553                                                                               |
| Crystal size (mm)                                                           | 0.27 × 0.27 × 0.19                                                                   | 0.31 × 0.23 × 0.20                              | 0.13 × 0.11 × 0.10                                                                  |
| Data collection                                                             |                                                                                      |                                                 |                                                                                     |
| Diffractometer                                                              | Rigaku Saturn724+ (4x4 bin mode)                                                     |                                                 |                                                                                     |
| Absorption correction                                                       | Multi-scan REQAB; Rigaku, 1998                                                       |                                                 |                                                                                     |
| $T_{\min}, T_{\max}$                                                        | 0.863, 1.000                                                                         | 0.856, 1.000                                    | 0.770, 1.000                                                                        |
| No. of measured, independent, and observed [ $I > 2\sigma(I)$ ] reflections | 61077, 17527, 15280                                                                  | 23818, 6613, 5830                               | 27991, 8085, 5892                                                                   |
| $R_{\text{int}}$                                                            | 0.076                                                                                | 0.044                                           | 0.051                                                                               |
| $(\sin \theta / \lambda)_{\text{max}}$ (Å <sup>-1</sup> )                   | 0.650                                                                                | 0.648                                           | 0.650                                                                               |
| Refinement                                                                  |                                                                                      |                                                 |                                                                                     |
| $R[F^2 > 2\sigma(F^2)], wR(F^2), S$                                         | 0.054, 0.148, 1.027                                                                  | 0.035, 0.081, 1.01                              | 0.042, 0.11, 1.00                                                                   |
| No. of reflections                                                          | 17527                                                                                | 6613                                            | 8085                                                                                |
| No. of parameters                                                           | 933                                                                                  | 379                                             | 397                                                                                 |
| H-atom treatment                                                            | H atoms treated by a mixture of independent and constrained refinement               |                                                 |                                                                                     |
| $\Delta\rho_{\text{max}}, \Delta\rho_{\text{min}}$ (e Å <sup>-3</sup> )     | 0.43, -0.34                                                                          | 0.14, -0.11                                     | 0.68, -0.77                                                                         |

**Table S5.** Solvent masks information for **Ph\_FLBr**

| Number | <i>x</i> | <i>y</i> | <i>z</i> | Volume               | Electron count | Content           |
|--------|----------|----------|----------|----------------------|----------------|-------------------|
| 1      | 0.396    | 0.702    | 0.885    |                      |                |                   |
| 2      | 0.396    | 0.798    | 0.385    | 154.4 Å <sup>3</sup> | 54.8           | CHCl <sub>3</sub> |
| 3      | 0.604    | 0.202    | 0.615    |                      |                |                   |
| 4      | 0.604    | 0.298    | 0.115    |                      |                |                   |

**Table S6.** Selected X-ray data, collection, and refinement parameters for diol complexes

| Crystal data                                                                      | <b>Mes_cat</b>                                                         | <b>Mes_naph</b>                                                |
|-----------------------------------------------------------------------------------|------------------------------------------------------------------------|----------------------------------------------------------------|
| CCDC Deposition No.                                                               | 2529537                                                                | 2529538                                                        |
| Chemical formula                                                                  | C <sub>39</sub> H <sub>37</sub> BN <sub>2</sub> O <sub>2</sub>         | C <sub>43</sub> H <sub>39</sub> BN <sub>2</sub> O <sub>2</sub> |
| $M_r$                                                                             | 576.51                                                                 | 626.57                                                         |
| Crystal system, Space group                                                       | Monoclinic, $P2_1/c$                                                   | Triclinic, $P-1$                                               |
| Temperature (K)                                                                   | 150                                                                    | 150                                                            |
| $a, b, c$ (Å)                                                                     | 8.4123(17),<br>20.137(4),<br>18.880(4)                                 | 11.865(6),<br>12.187(6),<br>13.010(6)                          |
| $\alpha, \beta, \gamma$ (deg)                                                     | 90, 102.955(3), 90                                                     | 99.730(5),<br>99.602(4),<br>108.243(5)                         |
| $V$ (Å <sup>3</sup> )                                                             | 3116.7(11)                                                             | 1711.6(14)                                                     |
| $Z$                                                                               | 4                                                                      | 2                                                              |
| Radiation type                                                                    | Mo $K\alpha$                                                           | Mo $K\alpha$                                                   |
| $\mu$ (mm <sup>-1</sup> )                                                         | 0.075                                                                  | 0.074                                                          |
| Crystal size (mm)                                                                 | 0.34 × 0.22 × 0.16                                                     | 0.25 × 0.12 × 0.07                                             |
| <b>Data collection</b>                                                            |                                                                        |                                                                |
| Diffractionmeter                                                                  | Rigaku Saturn724+ (4x4 bin mode)                                       |                                                                |
| Absorption correction                                                             | Multi-scan REQAB; Rigaku, 1998                                         |                                                                |
| $T_{\min}, T_{\max}$                                                              | 0.881, 1.000                                                           | 0.402, 1.000                                                   |
| No. of measured,<br>independent, and observed [ $I \geq 2\sigma(I)$ ] reflections | 24961, 7110, 5752                                                      | 14025, 7509, 3309                                              |
| $R_{\text{int}}$                                                                  | 0.040                                                                  | 0.082                                                          |
| $(\sin \theta / \lambda)_{\text{max}}$ (Å <sup>-1</sup> )                         | 0.649                                                                  | 0.649                                                          |
| <b>Refinement</b>                                                                 |                                                                        |                                                                |
| $R[F^2 > 2\sigma(F^2)], \omega R(F^2), S$                                         | 0.041, 0.110, 1.07                                                     | 0.068, 0.159, 0.92                                             |
| No. of reflections                                                                | 7110                                                                   | 7509                                                           |
| No. of parameters                                                                 | 403                                                                    | 439                                                            |
| H-atom treatment                                                                  | H atoms treated by a mixture of independent and constrained refinement |                                                                |
| $\Delta\rho_{\text{max}}, \Delta\rho_{\text{min}}$ (e Å <sup>-3</sup> )           | 0.22, -0.20                                                            | 0.28, -0.30                                                    |

## 5. Powder X-Ray Diffraction

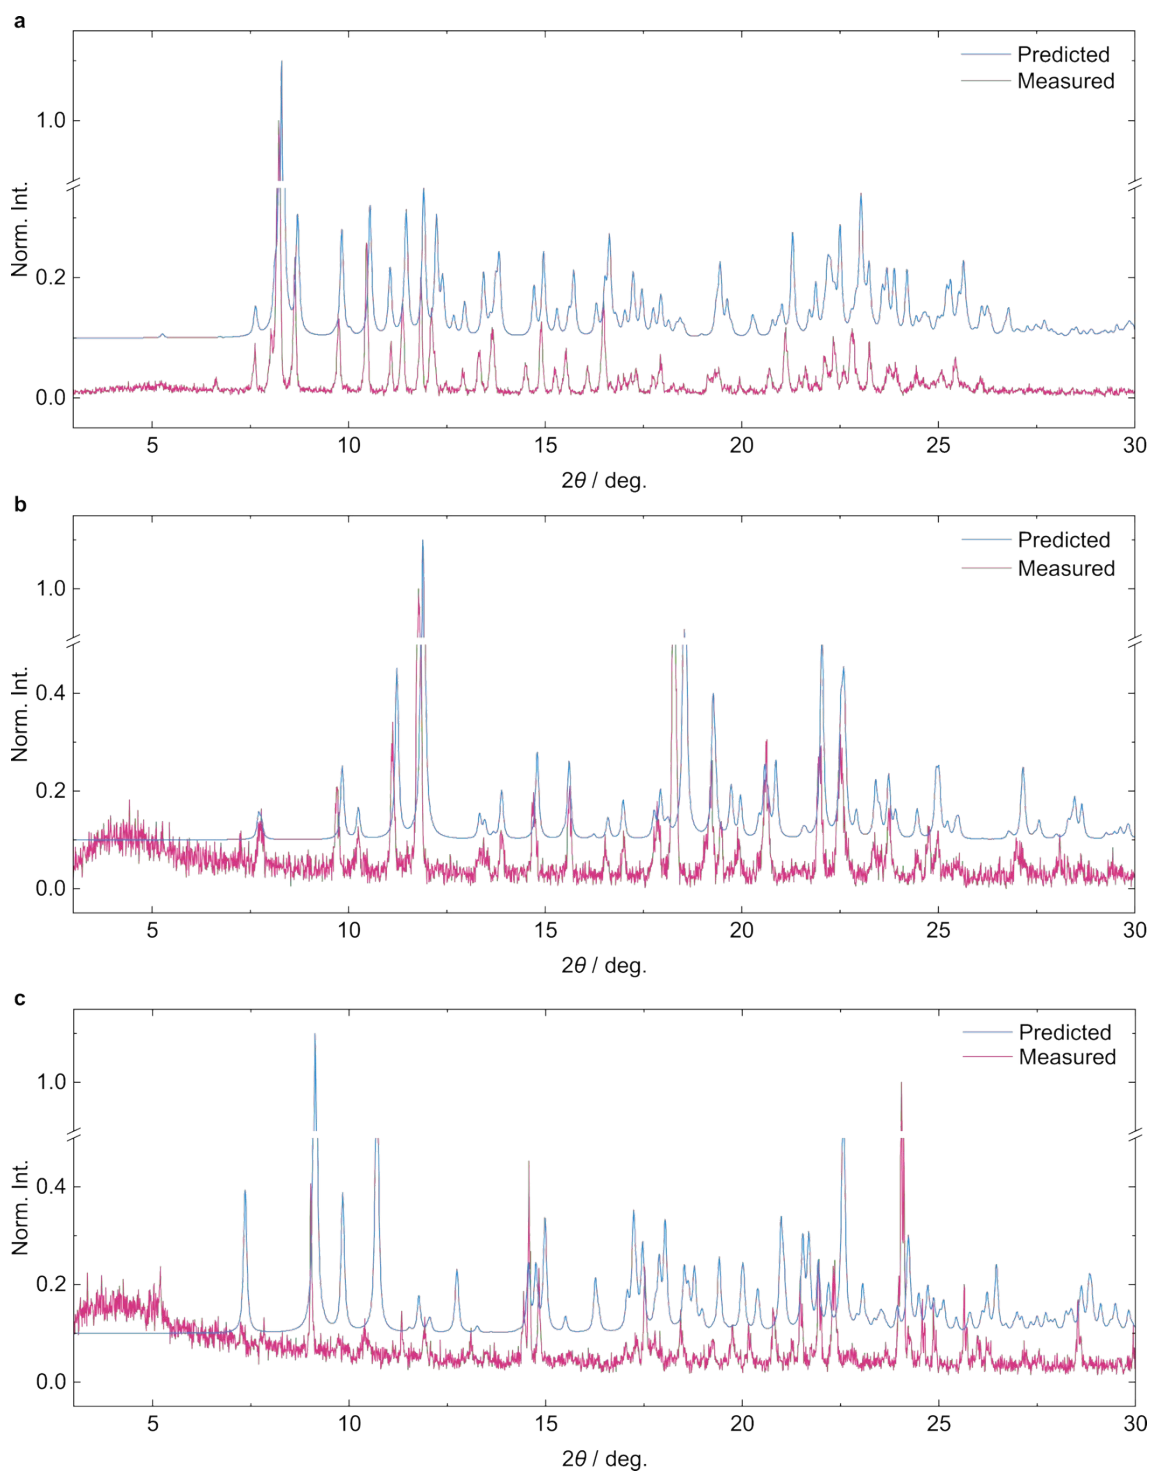

**Figure S2.** Normalized powder X-ray diffraction patterns of (a) **Mes\_FL**, (b) **Ph\_FL**, and (c) **Ph\_FLBr**. Blue charts show predicted patterns from SCXRD results.

## 6. DFT Calculations

Geometry optimization and single-point energy calculations were performed on Gaussian 16 Rev. C01.<sup>4</sup> All optimized structures were confirmed as local minima for each potential energy surface (PES) by using frequency calculations. The  $S_0$  structures of the complexes showed good agreement with their single-crystal structures. We assumed that the photophysical properties at the frozen state could be estimated using the  $S_0$  structures because of the restricted molecular motions at cryogenic temperatures. Spin-orbit coupling constants were calculated with Q-Chem 6.<sup>5</sup>

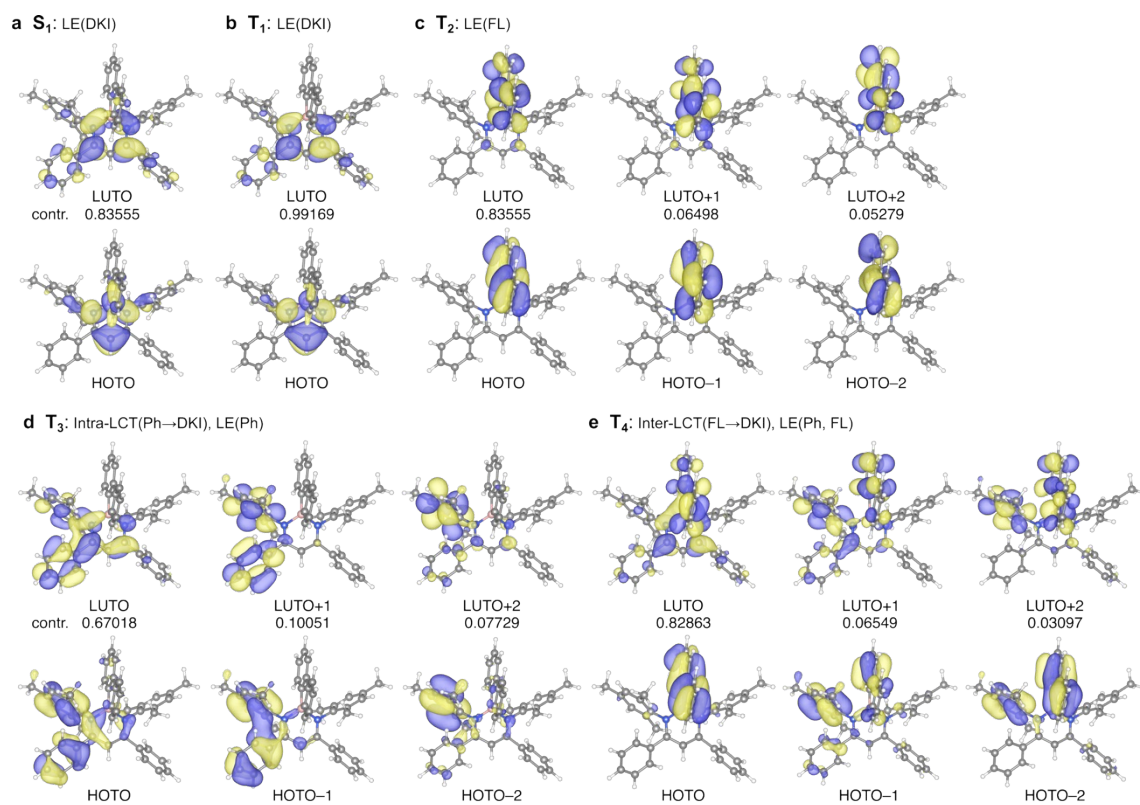

**Figure S3.** Selected NTOs of Mes\_FL for (a) S<sub>1</sub>, (b) T<sub>1</sub>, (c) T<sub>2</sub>, (d) T<sub>3</sub>, and (e) T<sub>4</sub> states.

Isovalue = 0.03.

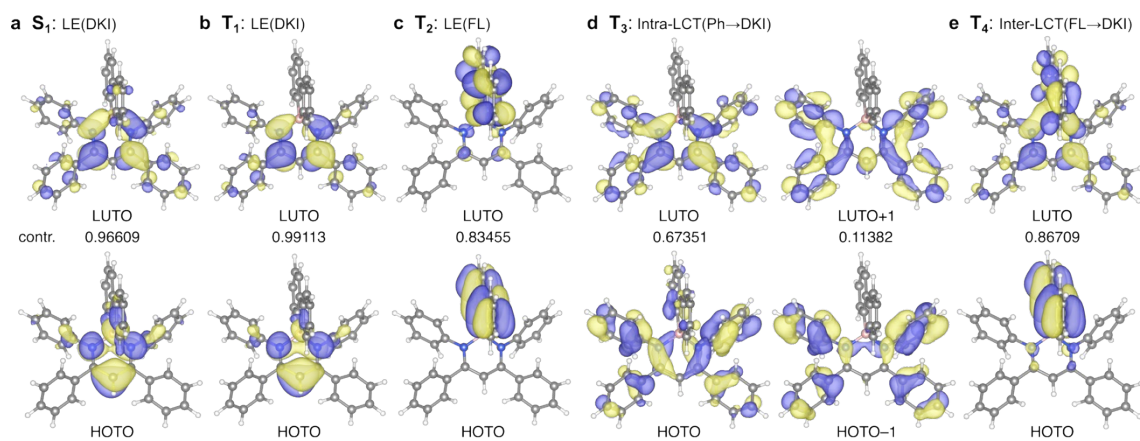

**Figure S4.** Selected NTOs of Ph\_FL for (a)  $S_1$ , (b)  $T_1$ , (c)  $T_2$ , (d)  $T_3$ , and (e)  $T_4$  states.

Isovalue = 0.03.

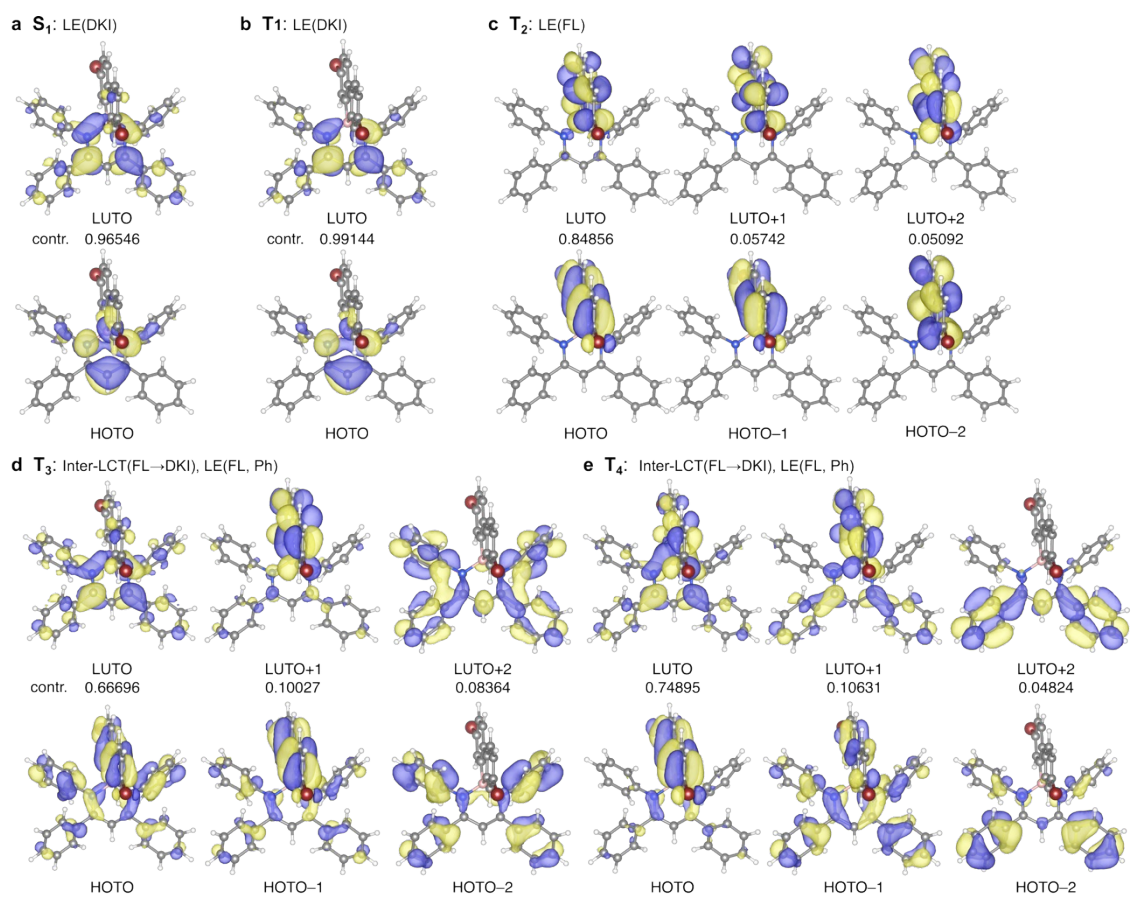

**Figure S5.** Selected NTOs of Ph\_FLBr for (a) S<sub>1</sub>, (b) T<sub>1</sub>, (c) T<sub>2</sub>, (d) T<sub>3</sub>, and (e) T<sub>4</sub> states.

Isovalue = 0.03.

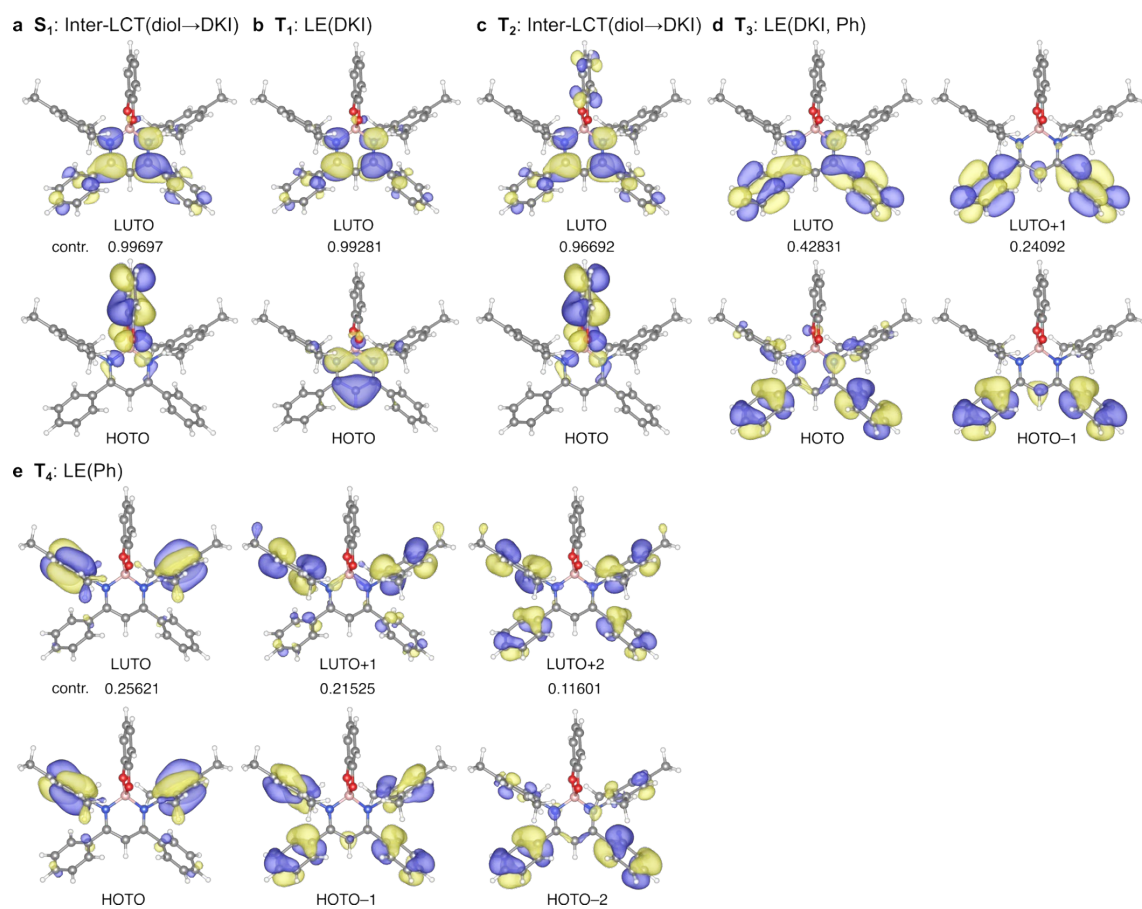

**Figure S6.** Selected NTOs of **Mes\_cat** for (a)  $S_1$ , (b)  $T_1$ , (c)  $T_2$ , (d)  $T_3$ , and (e)  $T_4$  states.

Isovalue = 0.03.

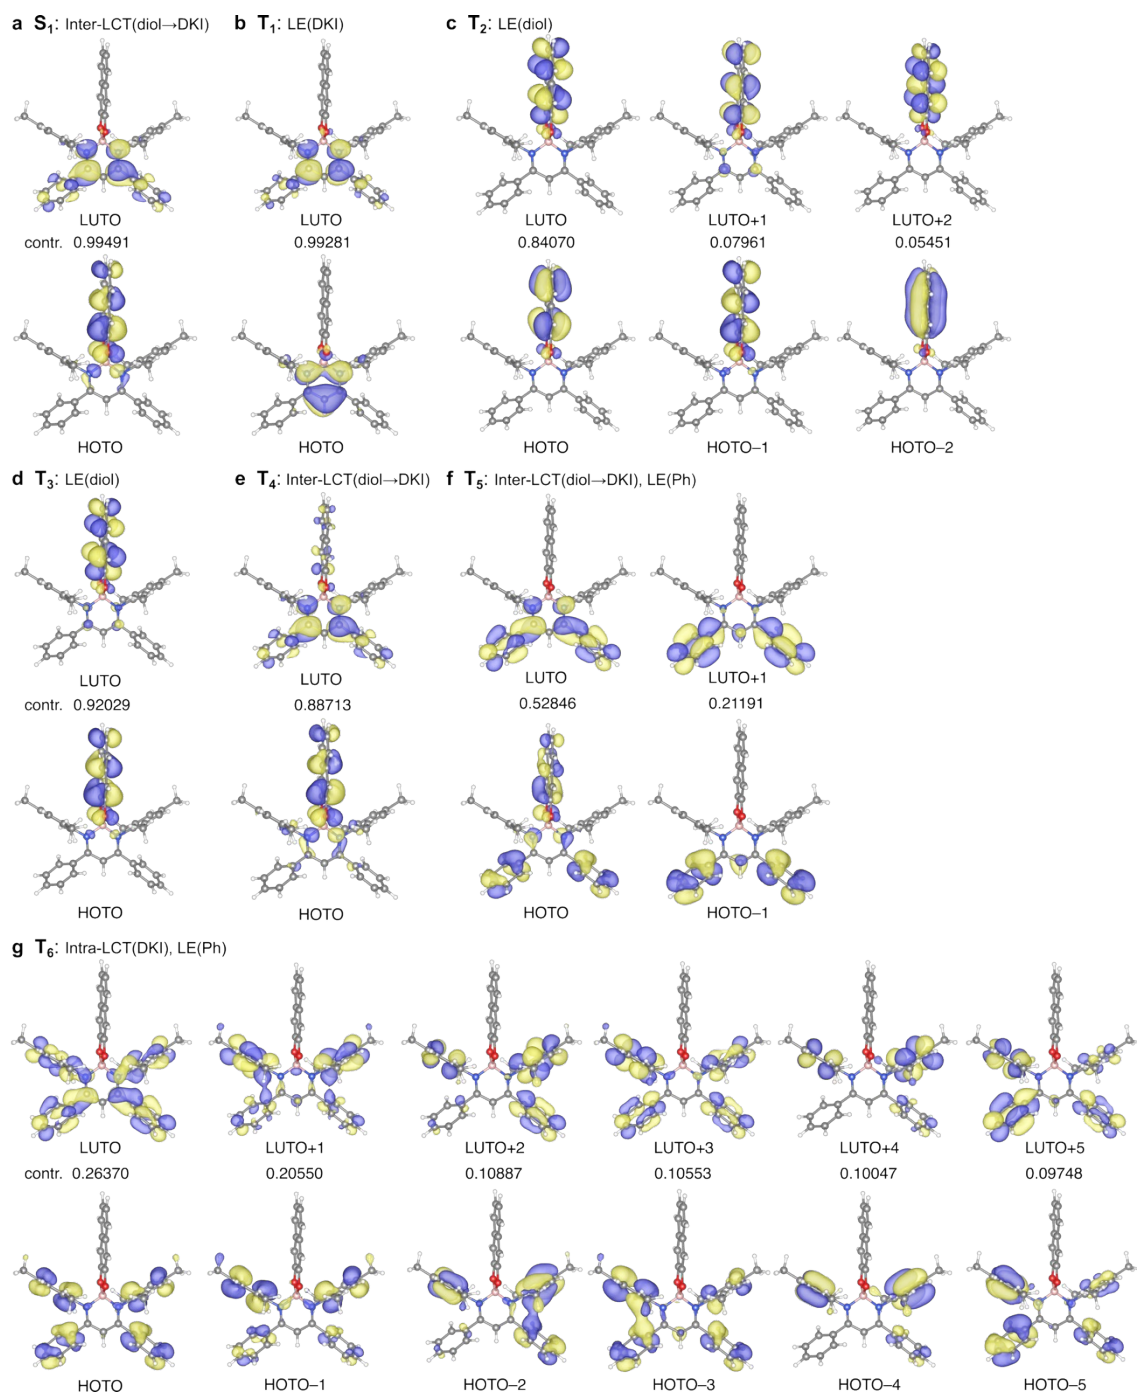

**Figure S7.** Selected NTOs of **Mes\_naph** for (a)  $S_1$ , (b)  $T_1$ , (c)  $T_2$ , (d)  $T_3$ , (e)  $T_4$ , (f)  $T_5$ , and (g)  $T_6$  states. Isovalue = 0.03.6

**a**  $T_7$ : LE(Ph)

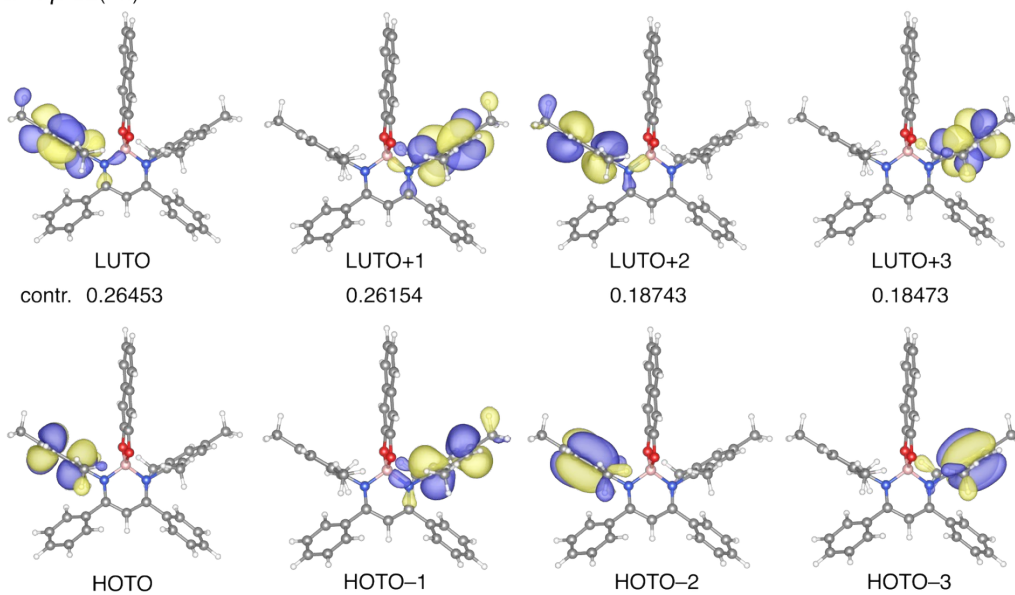

**b**  $T_8$ : LE(Ph)

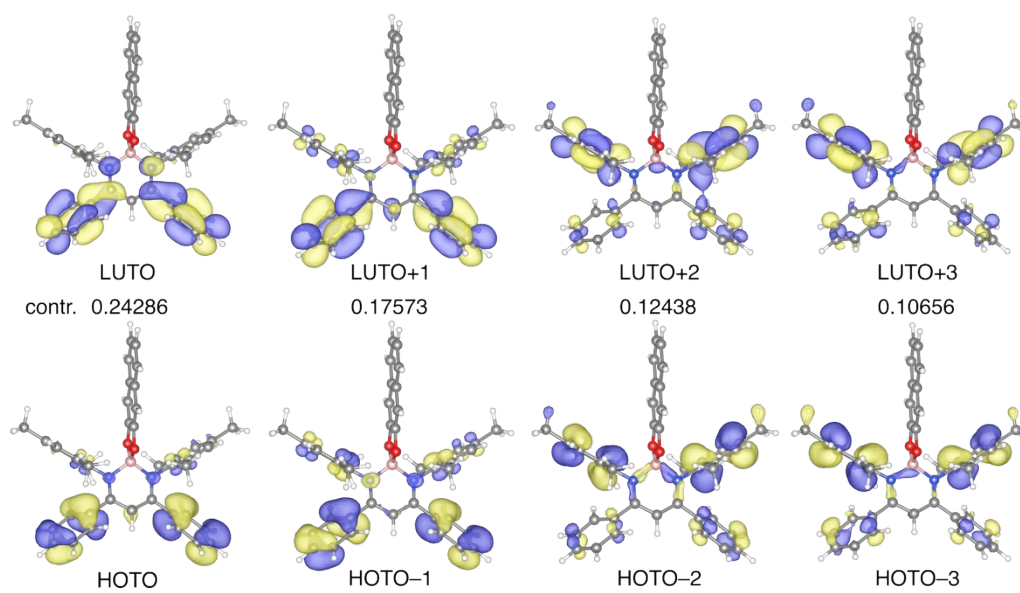

**Figure S8.** Selected NTOs of Mes\_naph for (a)  $T_7$  and (b)  $T_8$  states. Isovalue = 0.03.

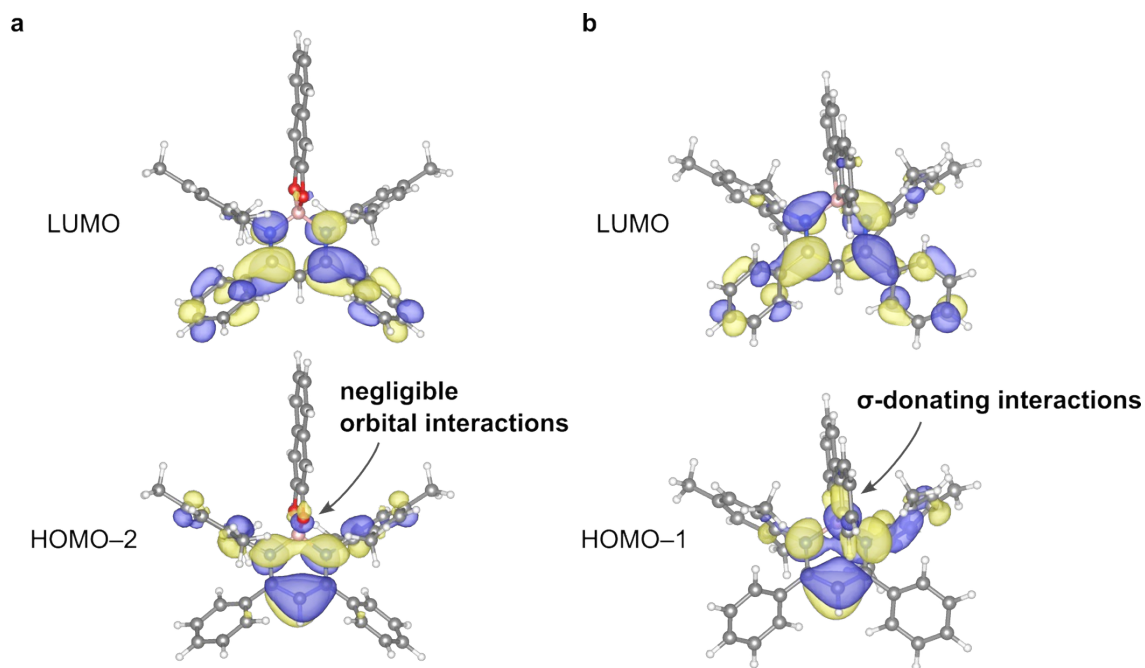

**Figure S9.** (a) Kohn–Sham HOMO–2 and LUMO of **Mes\_naph**. (b) Kohn–Sham HOMO–1 and LUMO of **Mes\_FL**. Isovalue = 0.03.

**Table S7.** Calculated energies of Kohn–Sham orbitals attributed to the DKI unit

|                 | HOMO of DKI / eV <sup>a</sup> | LUMO of DKI / eV <sup>b</sup> | $\Delta E$ / eV |
|-----------------|-------------------------------|-------------------------------|-----------------|
| <b>Mes_FL</b>   | –7.04                         | –0.87                         | 6.17            |
| <b>Ph_FL</b>    | –7.08                         | –0.98                         | 6.10            |
| <b>Ph_FLBr</b>  | –7.32                         | –1.16                         | 6.17            |
| <b>Mes_cat</b>  | –7.47                         | –0.90                         | 6.58            |
| <b>Mes_naph</b> | –7.60                         | –0.89                         | 6.71            |

<sup>a</sup>HOMO–2 of **Mes\_naph** and HOMO–1 of the other complexes. <sup>b</sup>LUMO of each molecule.

**Table S8.** Optimized geometry of **Mes\_cat** at the  $S_0$  state

Low Frequencies /  $\text{cm}^{-1}$ : -2.1833 -1.1121 -0.0007 0.0004 0.0008 0.3638  
15.8337 16.6847 25.8571

| Center Number | Atomic Number | Coordinates (Angstroms) |           |           |
|---------------|---------------|-------------------------|-----------|-----------|
| □             | □             | x                       | y         | z         |
| 1             | 7             | 1.276192                | 0.340635  | -0.134704 |
| 2             | 7             | -1.276126               | 0.340843  | -0.134701 |
| 3             | 6             | 2.54235                 | -0.363224 | -0.239032 |
| 4             | 6             | 1.230331                | 1.67349   | 0.008791  |
| 5             | 6             | -2.542327               | -0.362912 | -0.239006 |
| 6             | 6             | -1.230102               | 1.673662  | 0.00871   |
| 7             | 6             | 2.957205                | -0.837164 | -1.499627 |
| 8             | 6             | 3.318573                | -0.593706 | 0.913396  |
| 9             | 6             | 0.000173                | 2.332982  | 0.132974  |
| 10            | 6             | -2.957208               | -0.836971 | -1.499546 |
| 11            | 6             | -3.318583               | -0.59319  | 0.913451  |
| 12            | 6             | 2.150077                | -0.600529 | -2.754305 |
| 13            | 6             | 4.162715                | -1.539291 | -1.582589 |
| 14            | 6             | 2.920754                | -0.079336 | 2.276529  |
| 15            | 6             | 4.514401                | -1.307569 | 0.772663  |
| 16            | 1             | 0.000244                | 3.411248  | 0.183855  |
| 17            | 6             | -2.150071               | -0.600517 | -2.754263 |
| 18            | 6             | -2.920695               | -0.07866  | 2.276502  |
| 19            | 6             | -4.514438               | -1.307011 | 0.772801  |
| 20            | 1             | 1.285325                | -1.268065 | -2.78078  |
| 21            | 1             | 2.760094                | -0.781335 | -3.643577 |
| 22            | 1             | 1.759987                | 0.420824  | -2.810492 |
| 23            | 6             | 4.953101                | -1.794456 | -0.459074 |
| 24            | 1             | 4.489921                | -1.897398 | -2.556182 |
| 25            | 1             | 3.126408                | 0.993578  | 2.369286  |

|    |   |           |           |           |
|----|---|-----------|-----------|-----------|
| 26 | 1 | 1.857799  | -0.238451 | 2.466649  |
| 27 | 1 | 3.494071  | -0.590045 | 3.054789  |
| 28 | 1 | 5.116105  | -1.488189 | 1.66037   |
| 29 | 1 | -1.285745 | -1.268593 | -2.781009 |
| 30 | 1 | -2.7603   | -0.780746 | -3.643512 |
| 31 | 1 | -1.759351 | 0.420599  | -2.810259 |
| 32 | 1 | -4.489977 | -1.897252 | -2.555974 |
| 33 | 1 | -3.125599 | 0.994425  | 2.368889  |
| 34 | 1 | -1.857877 | -0.238444 | 2.466856  |
| 35 | 1 | -3.494518 | -0.588724 | 3.054809  |
| 36 | 1 | -5.116176 | -1.48747  | 1.660519  |
| 37 | 6 | -4.162752 | -1.53905  | -1.582423 |
| 38 | 6 | -4.953142 | -1.794051 | -0.458877 |
| 39 | 6 | 6.228612  | -2.595098 | -0.571784 |
| 40 | 1 | 6.029374  | -3.669834 | -0.477386 |
| 41 | 1 | 6.715214  | -2.439919 | -1.539684 |
| 42 | 1 | 6.941242  | -2.326486 | 0.21364   |
| 43 | 6 | -6.228673 | -2.594675 | -0.571478 |
| 44 | 1 | -6.029472 | -3.66939  | -0.476765 |
| 45 | 1 | -6.941362 | -2.325829 | 0.213815  |
| 46 | 1 | -6.715191 | -2.439747 | -1.53946  |
| 47 | 6 | -0.000325 | -2.842193 | -0.05314  |
| 48 | 6 | -0.000293 | -2.492211 | 1.304335  |
| 49 | 6 | -0.000545 | -4.1641   | -0.459064 |
| 50 | 6 | -0.000483 | -3.454859 | 2.298227  |
| 51 | 6 | -0.00074  | -5.150423 | 0.545113  |
| 52 | 1 | -0.000564 | -4.424327 | -1.512558 |
| 53 | 6 | -0.000711 | -4.803213 | 1.894953  |
| 54 | 1 | -0.000454 | -3.17364  | 3.346366  |
| 55 | 1 | -0.000917 | -6.197999 | 0.258704  |
| 56 | 1 | -0.000865 | -5.582701 | 2.651186  |

|    |   |           |           |           |
|----|---|-----------|-----------|-----------|
| 57 | 5 | 0.000041  | -0.557231 | 0.067561  |
| 58 | 8 | -0.000109 | -1.718559 | -0.82962  |
| 59 | 8 | -0.000044 | -1.134026 | 1.437528  |
| 60 | 6 | 2.453787  | 2.534299  | 0.018209  |
| 61 | 6 | 3.412853  | 2.504728  | -1.005035 |
| 62 | 6 | 2.6089    | 3.463734  | 1.060411  |
| 63 | 6 | 4.498872  | 3.378181  | -0.980359 |
| 64 | 1 | 3.30743   | 1.808996  | -1.827387 |
| 65 | 6 | 3.703588  | 4.326415  | 1.089895  |
| 66 | 1 | 1.872104  | 3.495397  | 1.85688   |
| 67 | 6 | 4.6519    | 4.287132  | 0.06747   |
| 68 | 1 | 5.227505  | 3.346586  | -1.784821 |
| 69 | 1 | 3.812918  | 5.028603  | 1.910986  |
| 70 | 1 | 5.503262  | 4.961015  | 0.08569   |
| 71 | 6 | -2.453426 | 2.534652  | 0.018029  |
| 72 | 6 | -2.608271 | 3.464444  | 1.05996   |
| 73 | 6 | -3.412643 | 2.504879  | -1.005066 |
| 74 | 6 | -3.702834 | 4.327277  | 1.089326  |
| 75 | 1 | -1.871346 | 3.496267  | 1.856304  |
| 76 | 6 | -4.498544 | 3.378482  | -0.98051  |
| 77 | 1 | -3.307434 | 1.80886   | -1.827197 |
| 78 | 6 | -4.651299 | 4.287788  | 0.067049  |
| 79 | 1 | -3.811947 | 5.029755  | 1.910198  |
| 80 | 1 | -5.227316 | 3.346725  | -1.78484  |
| 81 | 1 | -5.502571 | 4.961787  | 0.085161  |

**Table S9.** Optimized geometry of **Mes\_naph** at the  $S_0$  state

Low Frequencies /  $\text{cm}^{-1}$ : -1.2678 -0.0007 -0.0005 -0.0003 0.9009 1.7666  
4.8876 15.9147 17.8480

| Center Number | Atomic Number | Coordinates (Angstroms) |           |           |
|---------------|---------------|-------------------------|-----------|-----------|
| □             | □             | x                       | y         | z         |
| 1             | 8             | 0.721252                | -0.423786 | -1.242548 |
| 2             | 8             | 0.874599                | -0.313952 | 1.078105  |
| 3             | 7             | -0.32194                | 1.52948   | -0.081178 |
| 4             | 7             | -1.367808               | -0.776622 | 0.061956  |
| 5             | 6             | 1.915017                | -0.918502 | -0.844277 |
| 6             | 6             | -2.665489               | 1.190135  | -0.209954 |
| 7             | 1             | -3.645976               | 1.630243  | -0.304358 |
| 8             | 6             | -3.831956               | -0.972631 | -0.114559 |
| 9             | 6             | 0.82891                 | 2.390363  | 0.089521  |
| 10            | 6             | -2.558031               | -0.194941 | -0.081349 |
| 11            | 6             | 2.922619                | -1.418433 | -1.605903 |
| 12            | 1             | 2.837219                | -1.47681  | -2.685676 |
| 13            | 6             | 2.011595                | -0.846204 | 0.572685  |
| 14            | 6             | -1.553104               | 2.030241  | -0.167271 |
| 15            | 6             | -1.81319                | 3.499369  | -0.193657 |
| 16            | 6             | 1.134263                | 2.84954   | 1.381454  |
| 17            | 6             | -1.239799               | -2.21466  | 0.166644  |
| 18            | 6             | -4.7045                 | -0.767436 | -1.186921 |
| 19            | 1             | -4.416388               | -0.089809 | -1.983704 |
| 20            | 6             | 4.103732                | -1.879563 | -0.946915 |
| 21            | 6             | 1.644457                | 2.708158  | -0.999427 |
| 22            | 6             | 3.116349                | -1.272534 | 1.236573  |
| 23            | 1             | 3.184406                | -1.209367 | 2.317168  |
| 24            | 6             | -1.040223               | -2.79935  | 1.423196  |
| 25            | 6             | 2.25832                 | 3.646119  | 1.552978  |

|    |   |           |           |           |
|----|---|-----------|-----------|-----------|
| 26 | 1 | 2.495395  | 4.00643   | 2.550525  |
| 27 | 6 | -4.214502 | -1.838872 | 0.910868  |
| 28 | 1 | -3.562071 | -1.997602 | 1.759094  |
| 29 | 6 | 4.200608  | -1.805891 | 0.473804  |
| 30 | 6 | -2.695895 | 4.038613  | 0.745242  |
| 31 | 1 | -3.137718 | 3.388994  | 1.493565  |
| 32 | 6 | -5.922612 | -1.431906 | -1.245625 |
| 33 | 1 | -6.582529 | -1.271492 | -2.0917   |
| 34 | 6 | 5.19261   | -2.413205 | -1.673676 |
| 35 | 1 | 5.114995  | -2.468539 | -2.756041 |
| 36 | 6 | -1.277194 | -2.994813 | -0.998204 |
| 37 | 6 | -2.99985  | 5.393917  | 0.732983  |
| 38 | 1 | -3.67691  | 5.800328  | 1.476958  |
| 39 | 6 | 2.763198  | 3.512662  | -0.772978 |
| 40 | 1 | 3.394635  | 3.770699  | -1.619369 |
| 41 | 6 | -1.005638 | -1.997554 | 2.698634  |
| 42 | 1 | 0.005867  | -1.641025 | 2.900433  |
| 43 | 1 | -1.334816 | -2.609557 | 3.542017  |
| 44 | 1 | -1.639813 | -1.110023 | 2.647486  |
| 45 | 6 | -6.293629 | -2.29464  | -0.221827 |
| 46 | 1 | -7.246806 | -2.811466 | -0.262685 |
| 47 | 6 | 5.382124  | -2.268521 | 1.097203  |
| 48 | 1 | 5.452655  | -2.210485 | 2.179888  |
| 49 | 6 | -1.261092 | 4.337951  | -1.163238 |
| 50 | 1 | -0.596216 | 3.932124  | -1.914321 |
| 51 | 6 | 0.278648  | 2.487425  | 2.56452   |
| 52 | 1 | -0.731508 | 2.897864  | 2.475227  |
| 53 | 1 | 0.714613  | 2.88146   | 3.484658  |
| 54 | 1 | 0.196661  | 1.402351  | 2.656084  |
| 55 | 6 | 6.326858  | -2.854655 | -1.039126 |
| 56 | 1 | 7.150811  | -3.260775 | -1.617248 |

|    |   |           |           |           |
|----|---|-----------|-----------|-----------|
| 57 | 6 | -5.439509 | -2.490141 | 0.857254  |
| 58 | 1 | -5.726348 | -3.155396 | 1.664813  |
| 59 | 6 | 6.422895  | -2.781218 | 0.363727  |
| 60 | 1 | 7.320729  | -3.130719 | 0.863523  |
| 61 | 6 | 3.090979  | 3.986928  | 0.488252  |
| 62 | 6 | -1.506153 | -2.387736 | -2.3562   |
| 63 | 1 | -2.52815  | -2.009174 | -2.455437 |
| 64 | 1 | -1.356735 | -3.13738  | -3.13581  |
| 65 | 1 | -0.817645 | -1.559672 | -2.531062 |
| 66 | 6 | -2.441904 | 6.222285  | -0.232576 |
| 67 | 1 | -2.681731 | 7.280402  | -0.247627 |
| 68 | 6 | 1.371526  | 2.241454  | -2.406615 |
| 69 | 1 | 2.05266   | 1.431306  | -2.678924 |
| 70 | 1 | 1.530168  | 3.061315  | -3.113696 |
| 71 | 1 | 0.361828  | 1.853884  | -2.531915 |
| 72 | 6 | -1.578913 | 5.689055  | -1.183304 |
| 73 | 1 | -1.148615 | 6.32837   | -1.946937 |
| 74 | 6 | -0.881834 | -4.182127 | 1.490491  |
| 75 | 1 | -0.736869 | -4.641751 | 2.464737  |
| 76 | 6 | -1.109585 | -4.370786 | -0.875408 |
| 77 | 1 | -1.138669 | -4.980012 | -1.774745 |
| 78 | 6 | -0.902827 | -4.984333 | 0.356043  |
| 79 | 6 | 4.321236  | 4.825384  | 0.712299  |
| 80 | 1 | 4.122233  | 5.64914   | 1.403141  |
| 81 | 1 | 4.691092  | 5.249324  | -0.223936 |
| 82 | 1 | 5.129591  | 4.226648  | 1.144883  |
| 83 | 5 | -0.021729 | 0.001622  | -0.042438 |
| 84 | 6 | -0.684762 | -6.470891 | 0.452149  |
| 85 | 1 | -0.982116 | -6.855762 | 1.430569  |
| 86 | 1 | 0.371963  | -6.72057  | 0.309447  |
| 87 | 1 | -1.252349 | -7.008041 | -0.311821 |

**Table S10.** Optimized geometry of **Mes\_FL** at the  $S_0$  state

Low Frequencies /  $\text{cm}^{-1}$ : -2.2798 -1.9885 -0.7794 -0.0007 -0.0005 0.0007  
14.1797 20.4739 29.8918

| Center Number | Atomic Number | Coordinates (Angstroms) |           |           |
|---------------|---------------|-------------------------|-----------|-----------|
| □             | □             | x                       | y         | z         |
| 1             | 6             | -1.344051               | 1.532877  | 0.436002  |
| 2             | 6             | -0.14196                | 2.212967  | 0.678406  |
| 3             | 6             | 1.113459                | 1.672367  | 0.333041  |
| 4             | 1             | -0.183764               | 3.238536  | 1.015343  |
| 5             | 7             | -1.330137               | 0.222393  | 0.127995  |
| 6             | 7             | 1.241972                | 0.361846  | 0.099775  |
| 7             | 6             | 0.06361                 | -0.968903 | 2.104966  |
| 8             | 6             | 0.104284                | -2.077142 | -0.132236 |
| 9             | 6             | -0.014301               | -0.20596  | 3.273413  |
| 10            | 6             | 0.245417                | -2.368255 | 2.235488  |
| 11            | 6             | 0.068299                | -2.544944 | -1.446341 |
| 12            | 6             | 0.275731                | -3.023649 | 0.908351  |
| 13            | 6             | 0.093463                | -0.809277 | 4.535008  |
| 14            | 1             | -0.158228               | 0.870113  | 3.217037  |
| 15            | 6             | 0.354022                | -2.976326 | 3.487832  |
| 16            | 6             | 0.21154                 | -3.909057 | -1.72859  |
| 17            | 1             | -0.084291               | -1.854559 | -2.271869 |
| 18            | 6             | 0.422807                | -4.386101 | 0.635204  |
| 19            | 6             | 0.279853                | -2.188475 | 4.640542  |
| 20            | 1             | 0.030775                | -0.20173  | 5.434279  |
| 21            | 1             | 0.491291                | -4.051467 | 3.57561   |
| 22            | 6             | 0.392693                | -4.824914 | -0.690725 |
| 23            | 1             | 0.179606                | -4.25691  | -2.757751 |
| 24            | 1             | 0.555759                | -5.104371 | 1.440535  |

|    |   |           |           |           |
|----|---|-----------|-----------|-----------|
| 25 | 1 | 0.362867  | -2.652704 | 5.619733  |
| 26 | 1 | 0.50522   | -5.882805 | -0.913206 |
| 27 | 5 | -0.002422 | -0.594474 | 0.512664  |
| 28 | 6 | -2.433833 | -0.359218 | -0.609555 |
| 29 | 6 | -3.226765 | -1.378445 | -0.034654 |
| 30 | 6 | -2.712122 | 0.083379  | -1.922836 |
| 31 | 6 | -4.248689 | -1.950158 | -0.797234 |
| 32 | 6 | -3.740945 | -0.532638 | -2.644746 |
| 33 | 6 | -4.516472 | -1.559224 | -2.110191 |
| 34 | 1 | -4.858509 | -2.726484 | -0.339937 |
| 35 | 1 | -3.938782 | -0.188223 | -3.657749 |
| 36 | 6 | 2.449367  | -0.166394 | -0.514835 |
| 37 | 6 | 2.635349  | -0.024031 | -1.908125 |
| 38 | 6 | 3.419598  | -0.833392 | 0.258275  |
| 39 | 6 | 3.779381  | -0.562613 | -2.49979  |
| 40 | 6 | 4.551243  | -1.351204 | -0.385939 |
| 41 | 6 | 4.750775  | -1.240508 | -1.75962  |
| 42 | 1 | 3.912362  | -0.446742 | -3.573026 |
| 43 | 1 | 5.301412  | -1.854247 | 0.220616  |
| 44 | 6 | -1.983858 | 1.225481  | -2.593785 |
| 45 | 1 | -1.019378 | 1.439603  | -2.138141 |
| 46 | 1 | -1.819902 | 1.00667   | -3.65355  |
| 47 | 1 | -2.579664 | 2.144502  | -2.541019 |
| 48 | 6 | -3.053912 | -1.865146 | 1.383722  |
| 49 | 1 | -2.417926 | -2.754389 | 1.418973  |
| 50 | 1 | -2.586122 | -1.123444 | 2.031745  |
| 51 | 1 | -4.025506 | -2.138387 | 1.807198  |
| 52 | 6 | 1.634193  | 0.687158  | -2.781924 |
| 53 | 1 | 1.946677  | 0.650116  | -3.82864  |
| 54 | 1 | 0.646386  | 0.227365  | -2.710909 |
| 55 | 1 | 1.524226  | 1.741613  | -2.508105 |

|    |   |           |           |           |
|----|---|-----------|-----------|-----------|
| 56 | 6 | 3.334721  | -1.003656 | 1.757125  |
| 57 | 1 | 2.643949  | -0.305636 | 2.228691  |
| 58 | 1 | 2.984859  | -2.006726 | 2.018659  |
| 59 | 1 | 4.325955  | -0.87672  | 2.205328  |
| 60 | 6 | -5.597193 | -2.233068 | -2.92096  |
| 61 | 1 | -5.226583 | -3.155471 | -3.385328 |
| 62 | 1 | -6.453058 | -2.508374 | -2.296632 |
| 63 | 1 | -5.958346 | -1.585196 | -3.725071 |
| 64 | 6 | 5.961477  | -1.844435 | -2.429727 |
| 65 | 1 | 5.732556  | -2.835757 | -2.840303 |
| 66 | 1 | 6.311656  | -1.223698 | -3.260505 |
| 67 | 1 | 6.789394  | -1.9671   | -1.72536  |
| 68 | 6 | -2.612153 | 2.31734   | 0.516287  |
| 69 | 6 | -3.722872 | 1.8223    | 1.218306  |
| 70 | 6 | -2.686248 | 3.606747  | -0.034942 |
| 71 | 6 | -4.873397 | 2.594526  | 1.359616  |
| 72 | 1 | -3.675589 | 0.839713  | 1.671292  |
| 73 | 6 | -3.842767 | 4.374151  | 0.097061  |
| 74 | 1 | -1.835725 | 4.00031   | -0.581986 |
| 75 | 6 | -4.940183 | 3.8701    | 0.795582  |
| 76 | 1 | -5.718968 | 2.19941   | 1.914641  |
| 77 | 1 | -3.885144 | 5.365     | -0.345519 |
| 78 | 1 | -5.840717 | 4.467625  | 0.90255   |
| 79 | 6 | 2.248337  | 2.638622  | 0.198901  |
| 80 | 6 | 3.45564   | 2.474199  | 0.894653  |
| 81 | 6 | 2.077445  | 3.789271  | -0.587954 |
| 82 | 6 | 4.464596  | 3.43028   | 0.796074  |
| 83 | 1 | 3.59708   | 1.610997  | 1.531891  |
| 84 | 6 | 3.094358  | 4.736725  | -0.699168 |
| 85 | 1 | 1.143412  | 3.931903  | -1.122306 |
| 86 | 6 | 4.291705  | 4.559714  | -0.005909 |

|    |   |          |          |           |
|----|---|----------|----------|-----------|
| 87 | 1 | 5.388514 | 3.291858 | 1.349597  |
| 88 | 1 | 2.948197 | 5.61331  | -1.323344 |
| 89 | 1 | 5.083467 | 5.298753 | -0.085584 |

**Table S11.** Optimized geometry of **Ph\_FL** at the  $S_0$  state

Low Frequencies /  $\text{cm}^{-1}$ : -0.9929 -0.5172 -0.0005 0.0002 0.0006 2.3346  
16.7388 20.3033 37.4813

| Center Number | Atomic Number | Coordinates (Angstroms) |           |           |
|---------------|---------------|-------------------------|-----------|-----------|
| □             | □             | x                       | y         | z         |
| 1             | 7             | 1.261835                | 0.231173  | -0.142582 |
| 2             | 7             | -1.26211                | 0.23052   | -0.142699 |
| 3             | 6             | -2.440658               | -0.375565 | -0.68806  |
| 4             | 6             | 2.925578                | 0.030971  | -1.9293   |
| 5             | 1             | 2.409595                | 0.814811  | -2.473734 |
| 6             | 6             | 0.000871                | -2.583029 | 1.779448  |
| 7             | 6             | -2.457539               | 2.372395  | 0.128865  |
| 8             | 6             | 2.440644                | -0.37419  | -0.688027 |
| 9             | 6             | 0.000472                | -2.096052 | -0.549901 |
| 10            | 6             | 0.001125                | -3.131691 | 0.402852  |
| 11            | 6             | 0.000211                | -1.17289  | 1.756774  |
| 12            | 6             | 3.53277                 | 2.012457  | 0.943299  |
| 13            | 1             | 3.486572                | 1.094634  | 1.518556  |
| 14            | 6             | 3.082058                | -1.399018 | 0.004346  |
| 15            | 1             | 2.692513                | -1.719927 | 0.963937  |
| 16            | 6             | -4.209976               | -2.003716 | -0.538321 |
| 17            | 1             | -4.702662               | -2.802432 | 0.006713  |
| 18            | 6             | 0.000708                | -2.434218 | -1.898372 |
| 19            | 1             | 0.000122                | -1.6563   | -2.658437 |
| 20            | 6             | -0.000128               | -0.492013 | 2.971929  |
| 21            | 1             | -0.000588               | 0.595175  | 2.991152  |
| 22            | 6             | -3.081431               | -1.400701 | 0.004417  |
| 23            | 1             | -2.691628               | -1.721399 | 0.963977  |
| 24            | 6             | 4.058187                | -0.570842 | -2.466844 |

|    |   |           |           |           |
|----|---|-----------|-----------|-----------|
| 25 | 1 | 4.429586  | -0.247517 | -3.434065 |
| 26 | 6 | 1.219959  | 1.540347  | 0.098068  |
| 27 | 6 | 4.210874  | -2.001441 | -0.538494 |
| 28 | 1 | 4.703995  | -2.799934 | 0.006477  |
| 29 | 6 | 4.654375  | 2.827856  | 1.025411  |
| 30 | 1 | 5.480735  | 2.540515  | 1.667319  |
| 31 | 6 | 0.002072  | -4.469073 | 0.018102  |
| 32 | 1 | 0.002647  | -5.263468 | 0.759417  |
| 33 | 6 | -2.925844 | 0.029266  | -1.929341 |
| 34 | 1 | -2.410246 | 0.813303  | -2.47385  |
| 35 | 6 | 0.001631  | -3.772415 | -2.295534 |
| 36 | 1 | 0.001829  | -4.026306 | -3.351437 |
| 37 | 6 | 4.705238  | -1.588491 | -1.772945 |
| 38 | 1 | 5.585869  | -2.062162 | -2.194453 |
| 39 | 6 | 0.001172  | -3.288776 | 2.979305  |
| 40 | 1 | 0.001639  | -4.375325 | 2.987279  |
| 41 | 6 | -3.534127 | 2.010635  | 0.943059  |
| 42 | 1 | -3.487603 | 1.092796  | 1.51826   |
| 43 | 6 | -1.221023 | 1.539737  | 0.097912  |
| 44 | 6 | 2.45607   | 2.373651  | 0.128978  |
| 45 | 6 | 4.719996  | 4.006482  | 0.286553  |
| 46 | 1 | 5.600604  | 4.637997  | 0.346208  |
| 47 | 6 | 2.521406  | 3.564799  | -0.596131 |
| 48 | 1 | 1.687053  | 3.851284  | -1.228226 |
| 49 | 6 | -0.000701 | 2.177369  | 0.34613   |
| 50 | 1 | -0.000958 | 3.212633  | 0.653365  |
| 51 | 6 | 0.002333  | -4.785465 | -1.33925  |
| 52 | 1 | 0.00311   | -5.825468 | -1.651971 |
| 53 | 6 | -2.523412 | 3.563571  | -0.596171 |
| 54 | 1 | -1.689184 | 3.850498  | -1.228231 |
| 55 | 6 | -4.704656 | -1.591084 | -1.772751 |

|    |   |           |           |           |
|----|---|-----------|-----------|-----------|
| 56 | 1 | -5.585077 | -2.065267 | -2.194128 |
| 57 | 6 | -4.058181 | -0.573161 | -2.466785 |
| 58 | 1 | -4.429807 | -0.250109 | -3.43401  |
| 59 | 6 | 3.651615  | 4.372766  | -0.525774 |
| 60 | 1 | 3.695686  | 5.289561  | -1.104864 |
| 61 | 6 | 0.000176  | -1.192351 | 4.181506  |
| 62 | 1 | -0.000122 | -0.650844 | 5.123066  |
| 63 | 6 | 0.00082   | -2.585192 | 4.183348  |
| 64 | 1 | 0.001017  | -3.125832 | 5.125216  |
| 65 | 6 | -4.656121 | 2.825512  | 1.025184  |
| 66 | 1 | -5.48239  | 2.537711  | 1.667007  |
| 67 | 6 | -4.722264 | 4.004165  | 0.286419  |
| 68 | 1 | -5.603145 | 4.635296  | 0.346152  |
| 69 | 6 | -3.654007 | 4.370992  | -0.525836 |
| 70 | 1 | -3.698478 | 5.287784  | -1.104897 |
| 71 | 5 | -0.000103 | -0.668623 | 0.208153  |

**Table S12.** Optimized geometry of **Ph\_FLBr** complexes at the  $S_0$  state

Low Frequencies /  $\text{cm}^{-1}$ : -0.0084 -0.0024 -0.0007 1.3131 2.0980 2.2782  
11.5084 13.7074 20.5133

| Center Number | Atomic Number | Coordinates (Angstroms) |           |           |
|---------------|---------------|-------------------------|-----------|-----------|
| □             | □             | x                       | y         | z         |
| 1             | 35            | 4.328624                | 0.000013  | 3.64647   |
| 2             | 35            | -5.677132               | -0.000019 | -0.092637 |
| 3             | 6             | 1.862029                | 2.458236  | -2.095413 |
| 4             | 6             | -1.621476               | -0.000006 | 0.765686  |
| 5             | 6             | 1.291728                | -1.220381 | -1.493671 |
| 6             | 6             | 1.862049                | -2.458218 | -2.095417 |
| 7             | 6             | 2.214981                | 3.54012   | -1.284372 |
| 8             | 1             | 2.032097                | 3.493799  | -0.216706 |
| 9             | 6             | -0.227004               | 0.000002  | 2.687896  |
| 10            | 6             | -0.597039               | 2.426551  | -0.611546 |
| 11            | 6             | 0.700972                | 0.000002  | 1.62738   |
| 12            | 6             | 1.291719                | 1.220394  | -1.493668 |
| 13            | 6             | -2.837544               | -0.000011 | 0.098121  |
| 14            | 1             | -2.882735               | -0.000013 | -0.986081 |
| 15            | 6             | 2.118698                | 2.522053  | -3.466203 |
| 16            | 1             | 1.848857                | 1.68336   | -4.099872 |
| 17            | 6             | -0.597015               | -2.426558 | -0.611549 |
| 18            | 6             | -1.613062               | -0.000002 | 2.171436  |
| 19            | 6             | 2.059289                | 0.000005  | 1.922709  |
| 20            | 1             | 2.805315                | 0.000006  | 1.134671  |
| 21            | 6             | 2.470535                | 0.000008  | 3.253652  |
| 22            | 6             | 2.215003                | -3.540101 | -1.284376 |
| 23            | 1             | 2.032112                | -3.493784 | -0.216711 |
| 24            | 6             | 1.906401                | 0.000009  | -1.794817 |

|    |   |           |           |           |
|----|---|-----------|-----------|-----------|
| 25 | 1 | 2.828865  | 0.000014  | -2.356339 |
| 26 | 6 | -1.277216 | 2.869873  | -1.742931 |
| 27 | 1 | -1.151558 | 2.342253  | -2.682614 |
| 28 | 6 | 2.118726  | -2.522029 | -3.466206 |
| 29 | 1 | 1.848883  | -1.683336 | -4.099874 |
| 30 | 6 | -0.772856 | 3.082678  | 0.604671  |
| 31 | 1 | -0.249048 | 2.726619  | 1.484894  |
| 32 | 6 | -1.277204 | -2.869875 | -1.742929 |
| 33 | 1 | -1.151567 | -2.342242 | -2.682608 |
| 34 | 6 | -2.798837 | -0.000004 | 2.897607  |
| 35 | 1 | -2.793616 | -0.000001 | 3.983771  |
| 36 | 6 | 2.809498  | 4.666553  | -1.838586 |
| 37 | 1 | 3.087695  | 5.496731  | -1.197682 |
| 38 | 6 | 0.193725  | 0.000005  | 4.013281  |
| 39 | 1 | -0.522177 | 0.000005  | 4.830223  |
| 40 | 6 | 2.698836  | 3.657234  | -4.022513 |
| 41 | 1 | 2.880834  | 3.700895  | -5.091457 |
| 42 | 6 | -0.772804 | -3.082704 | 0.604662  |
| 43 | 1 | -0.248986 | -2.726651 | 1.484881  |
| 44 | 6 | 2.809529  | -4.666529 | -1.83859  |
| 45 | 1 | 3.087727  | -5.496708 | -1.197687 |
| 46 | 6 | 1.557534  | 0.000008  | 4.30017   |
| 47 | 1 | 1.905383  | 0.00001   | 5.326859  |
| 48 | 6 | -1.619611 | 4.182201  | 0.682358  |
| 49 | 1 | -1.755716 | 4.685759  | 1.634006  |
| 50 | 6 | -2.120209 | 3.972958  | -1.661957 |
| 51 | 1 | -2.649297 | 4.309977  | -2.547483 |
| 52 | 6 | 3.046756  | 4.731111  | -3.209244 |
| 53 | 1 | 3.504381  | 5.61534   | -3.641071 |
| 54 | 6 | -4.016131 | -0.000009 | 2.220829  |
| 55 | 1 | -4.951936 | -0.000011 | 2.767994  |

|    |   |           |           |           |
|----|---|-----------|-----------|-----------|
| 56 | 6 | 3.046795  | -4.731083 | -3.209247 |
| 57 | 1 | 3.504427  | -5.615308 | -3.641073 |
| 58 | 6 | -4.01928  | -0.000013 | 0.831564  |
| 59 | 6 | 2.698873  | -3.657206 | -4.022515 |
| 60 | 1 | 2.880877  | -3.700863 | -5.091458 |
| 61 | 6 | -2.294881 | 4.631896  | -0.449155 |
| 62 | 1 | -2.95938  | 5.487157  | -0.383861 |
| 63 | 5 | -0.103717 | -0.000001 | 0.210629  |
| 64 | 6 | -2.120183 | -3.972971 | -1.661956 |
| 65 | 1 | -2.649281 | -4.309985 | -2.547477 |
| 66 | 6 | -1.619545 | -4.182238 | 0.682349  |
| 67 | 1 | -1.755629 | -4.685809 | 1.633992  |
| 68 | 6 | -2.294828 | -4.631926 | -0.449159 |
| 69 | 1 | -2.959317 | -5.487196 | -0.383866 |
| 70 | 7 | 0.234823  | -1.260742 | -0.683199 |
| 71 | 7 | 0.234812  | 1.260744  | -0.683196 |

## 7. NMR Charts

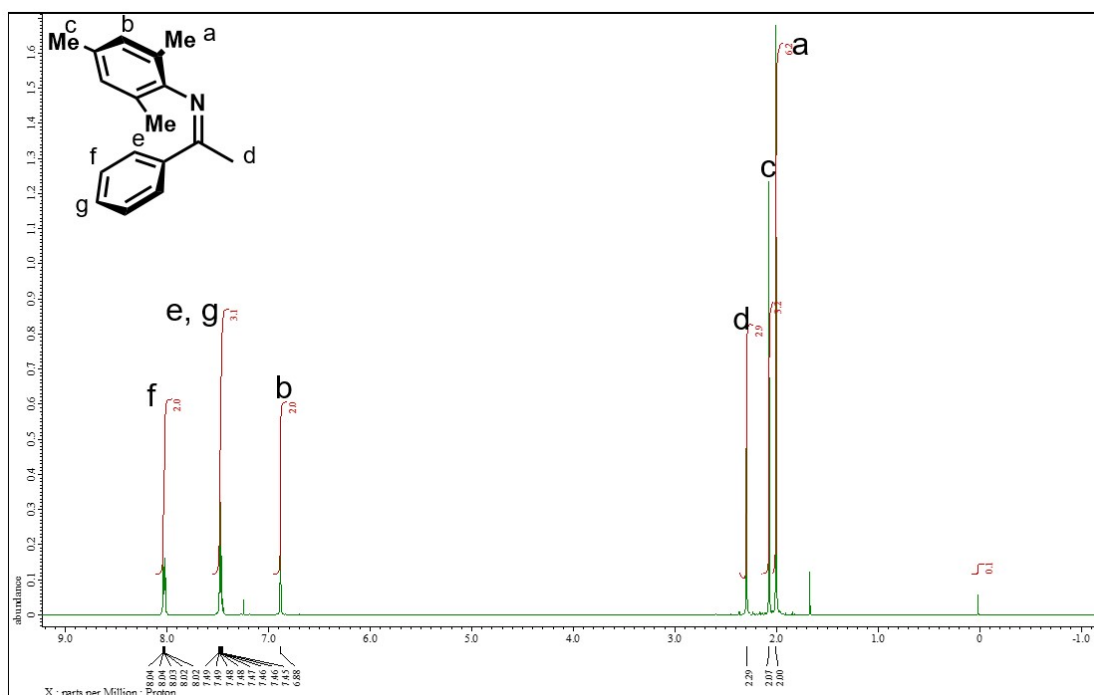

Chart S1.  $^1\text{H}$  NMR spectrum of Mes\_imine in  $\text{CDCl}_3$ .

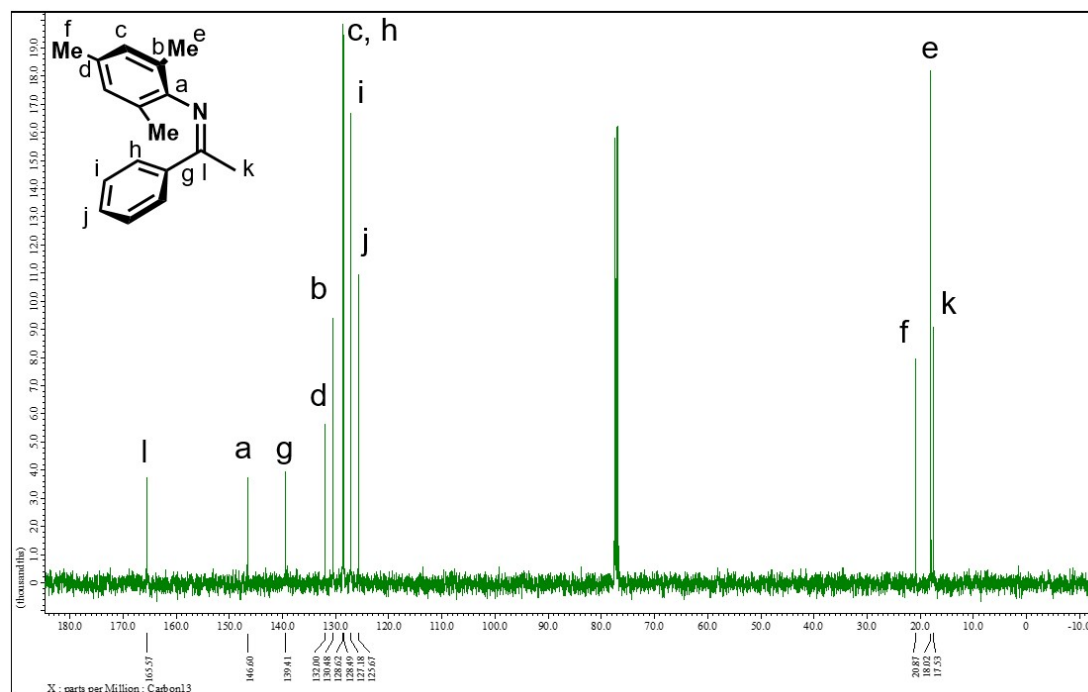

Chart S2.  $^{13}\text{C}\{^1\text{H}\}$  NMR spectrum of Mes\_imine in  $\text{CDCl}_3$ .



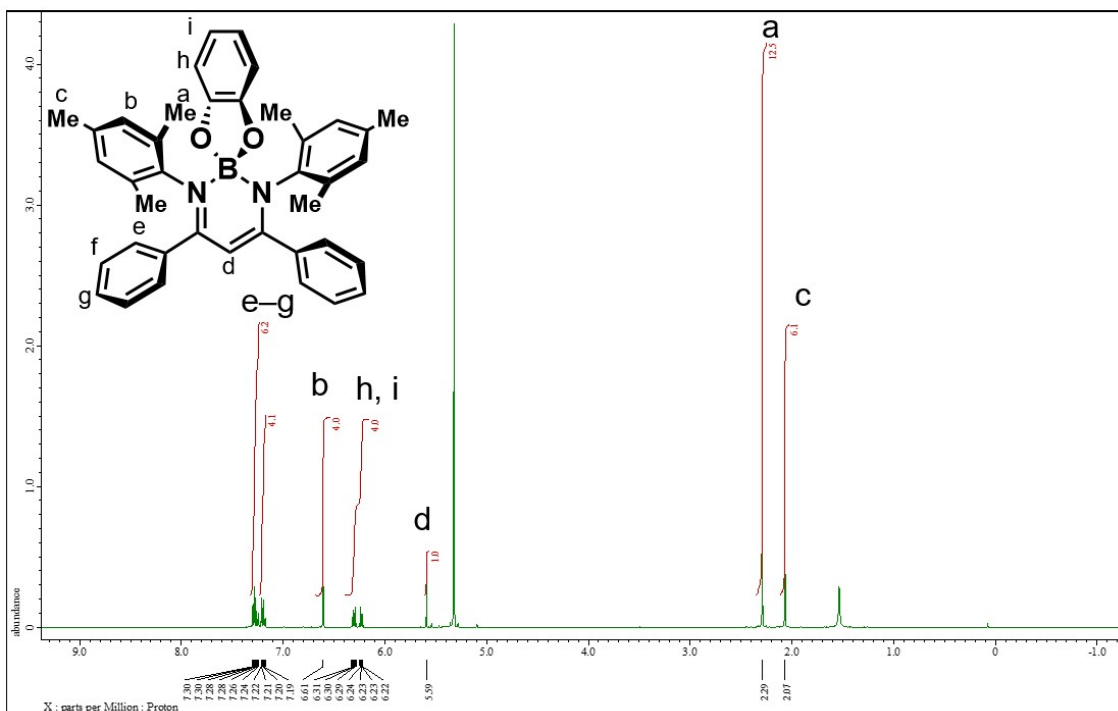

Chart S5.  $^1\text{H}$  NMR spectrum of Mes\_cat in  $\text{CD}_2\text{Cl}_2$ .

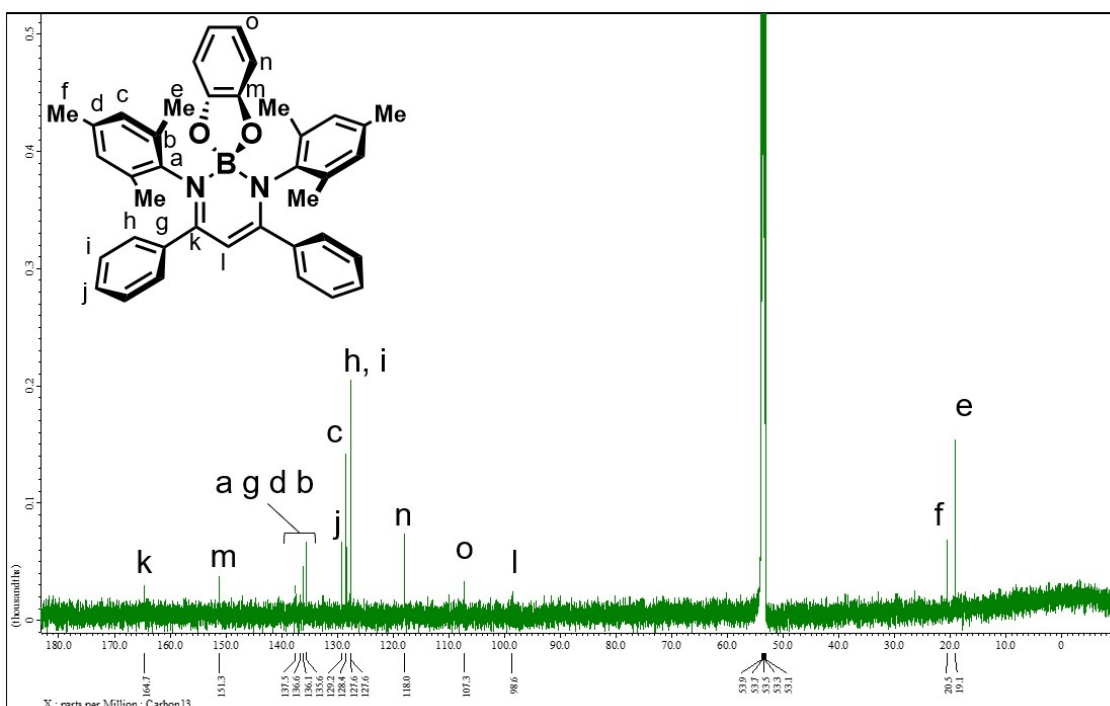

Chart S6.  $^{13}\text{C}\{^1\text{H}\}$  NMR spectrum of Mes\_cat in  $\text{CD}_2\text{Cl}_2$ .



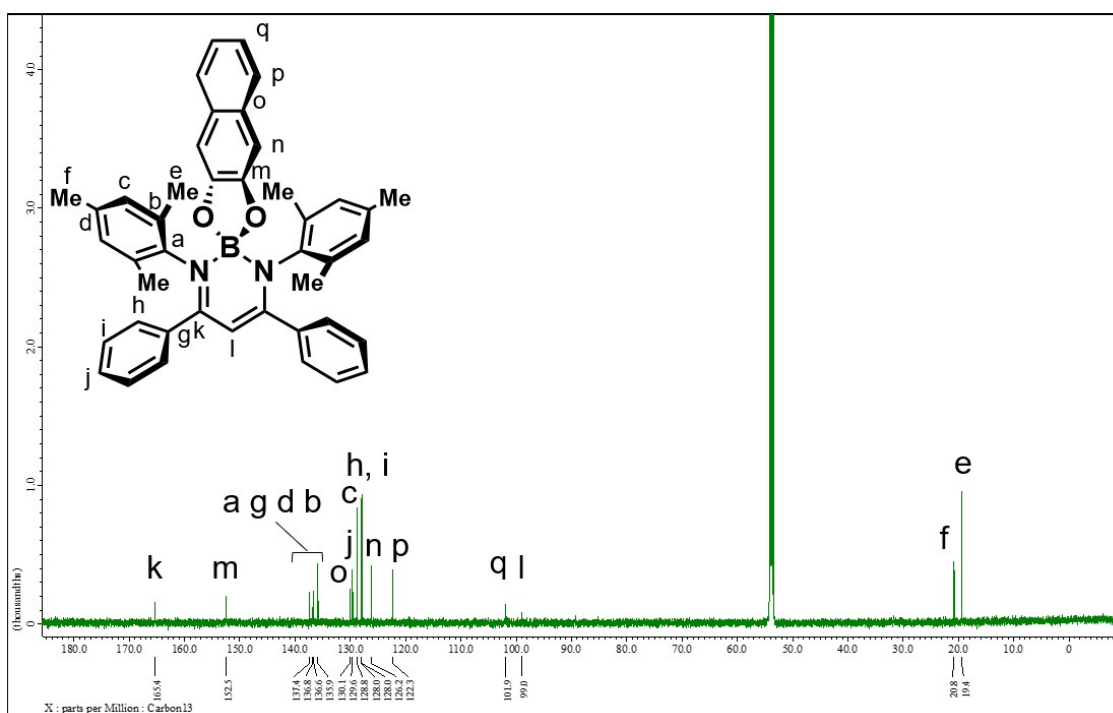

Chart S9.  $^{13}\text{C}\{^1\text{H}\}$  NMR spectrum of Mes\_naph in  $\text{CD}_2\text{Cl}_2$ .

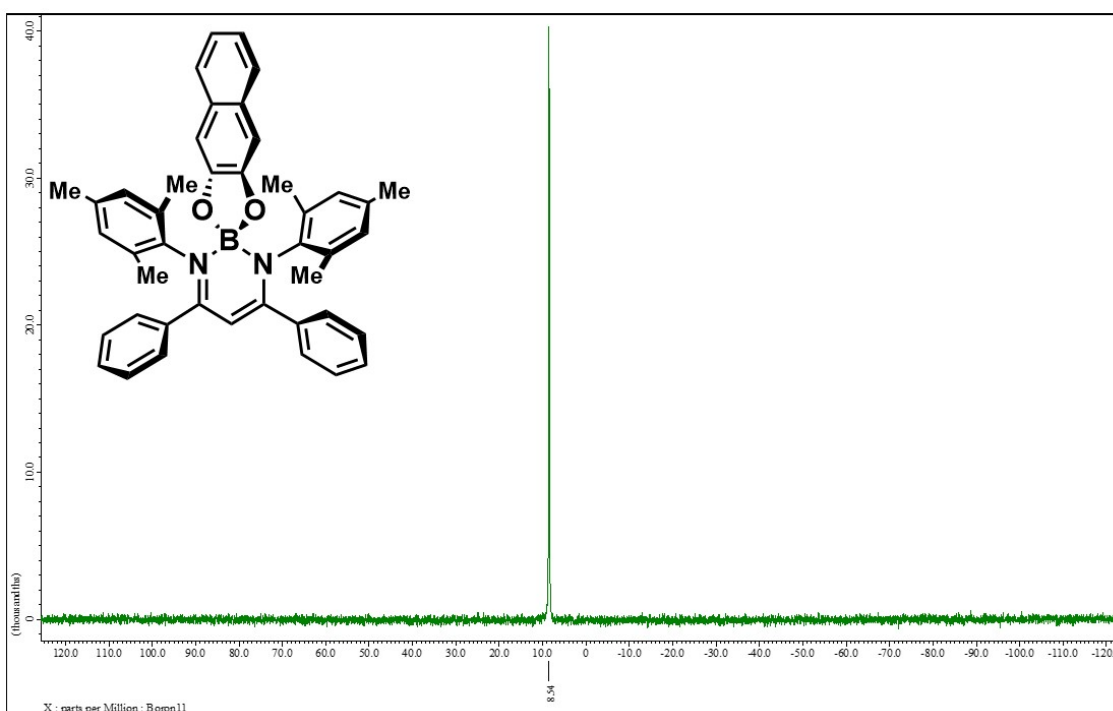

Chart S10.  $^{11}\text{B}\{^1\text{H}\}$  NMR spectrum of Mes\_naph in  $\text{CD}_2\text{Cl}_2$ .

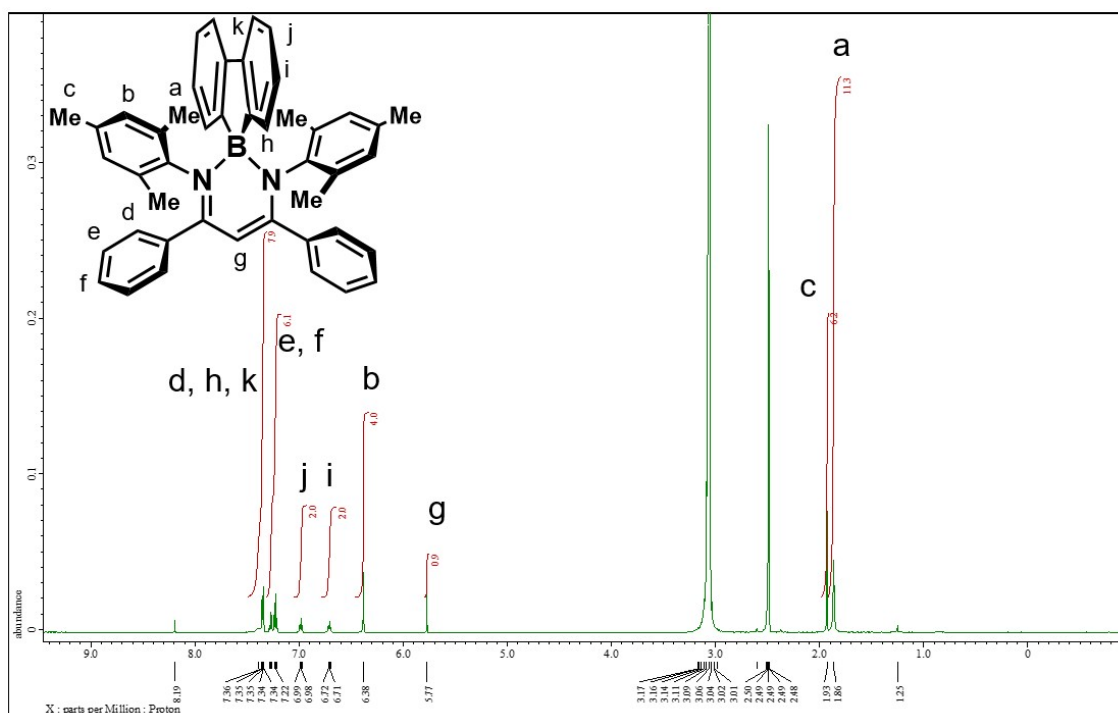

Chart S11.  $^1\text{H}$  NMR spectrum of Mes\_FL in DMSO- $d_6$  at 363 K.

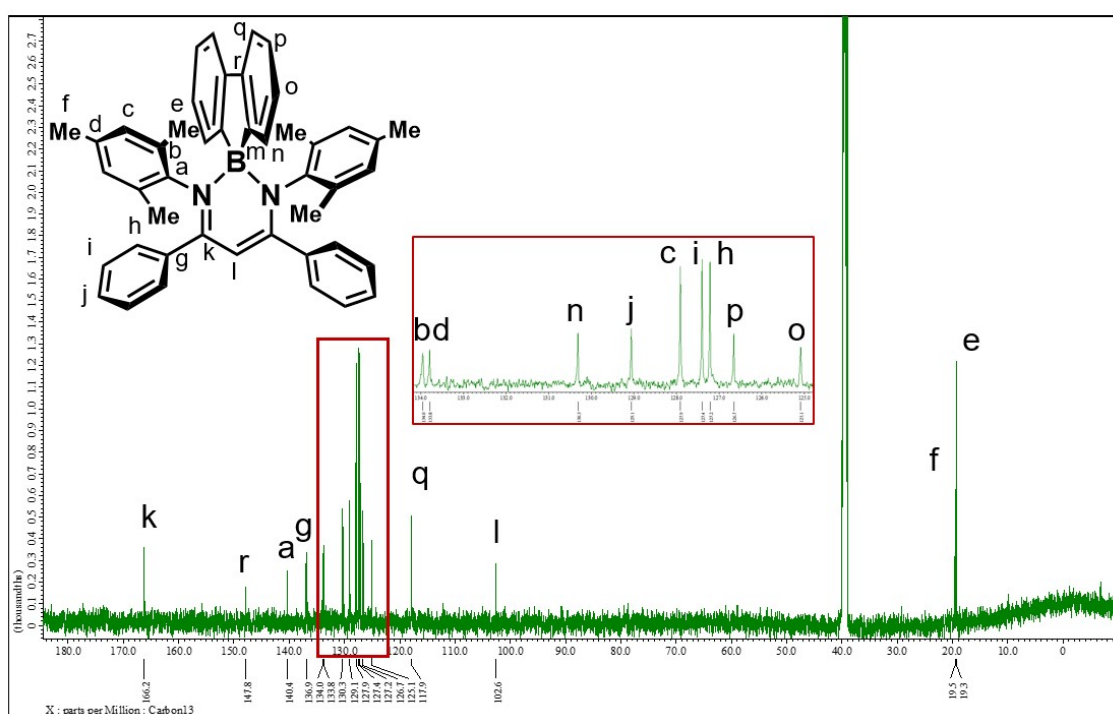

Chart S12.  $^{13}\text{C}\{^1\text{H}\}$  NMR spectrum of Mes\_FL in DMSO- $d_6$  at 363 K.

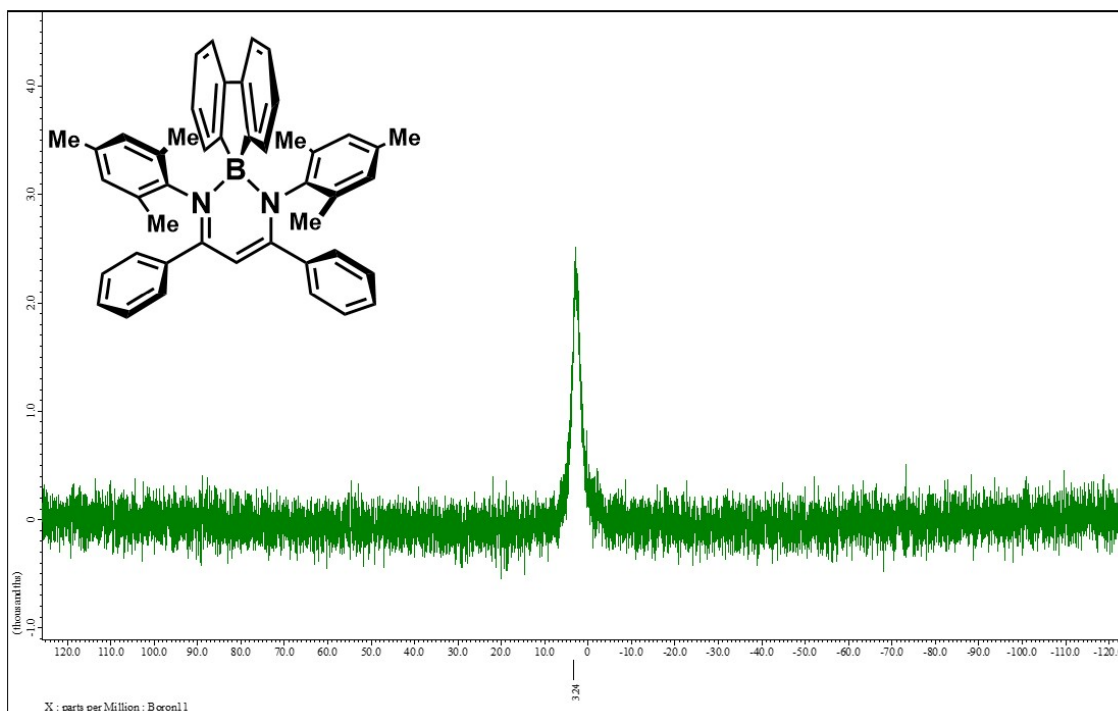

Chart S13.  $^{11}\text{B}\{^1\text{H}\}$  NMR spectrum of **Mes\_FL** in  $\text{CDCl}_3$ .

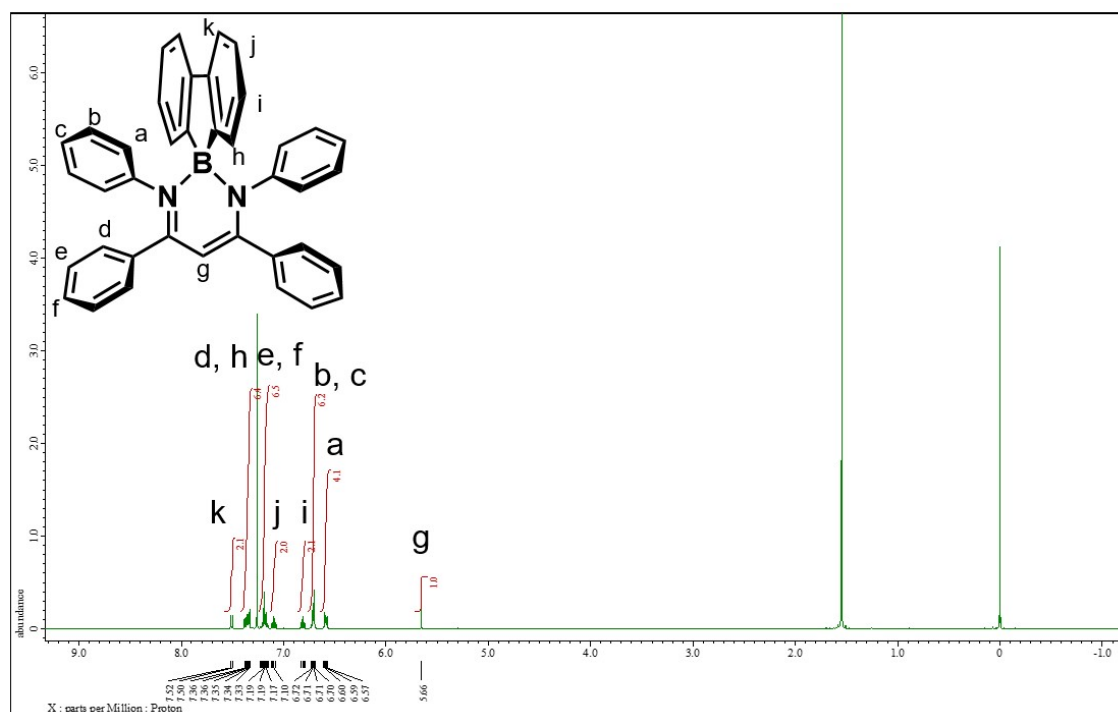

Chart S14.  $^1\text{H}$  NMR spectrum of **Ph\_FL** in  $\text{CDCl}_3$ .

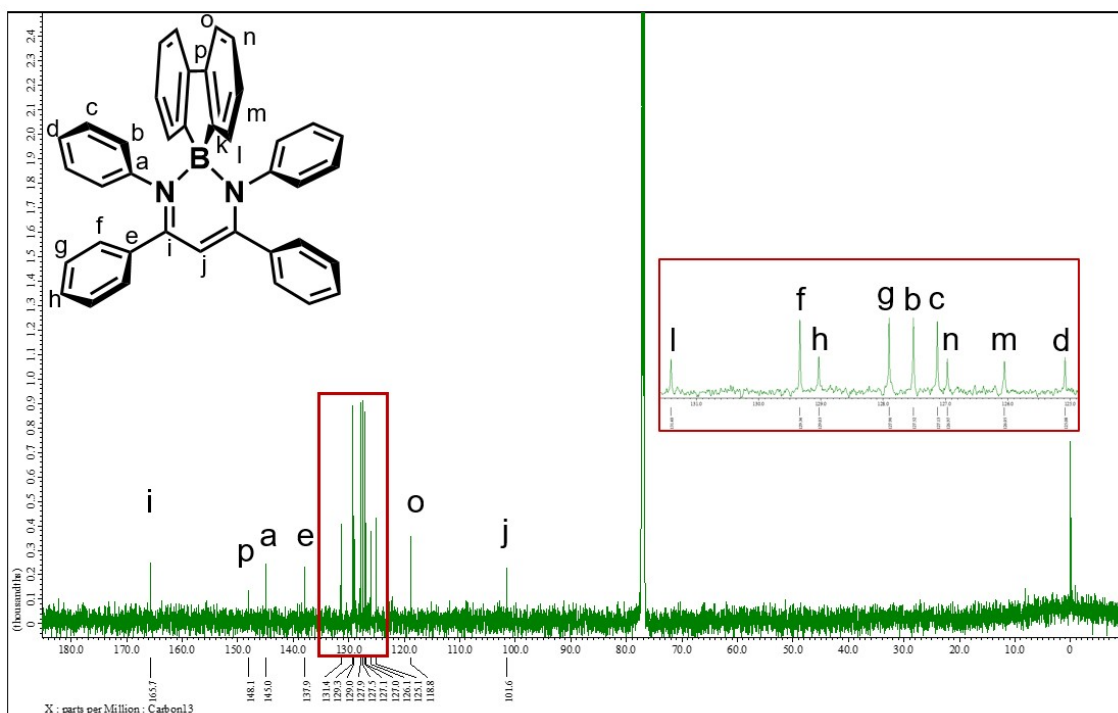

Chart S15.  $^{13}\text{C}\{^1\text{H}\}$  NMR spectrum of Ph\_FL in  $\text{CDCl}_3$ .

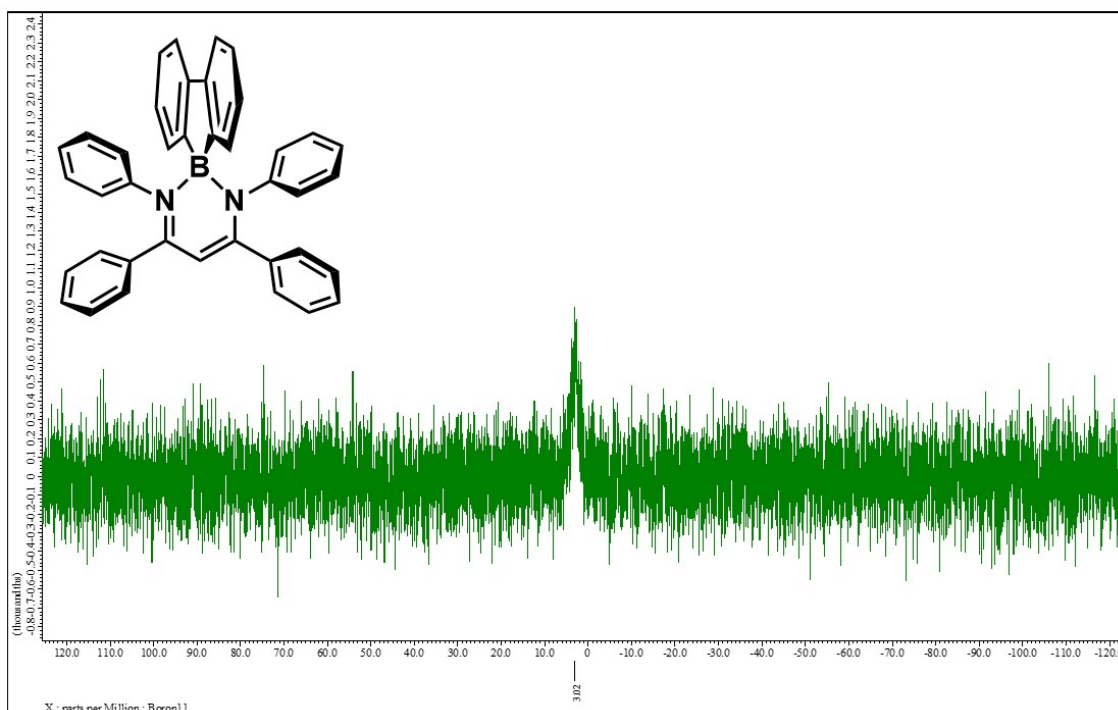

Chart S16.  $^{11}\text{B}\{^1\text{H}\}$  NMR spectrum of Ph\_FL in  $\text{CDCl}_3$ .

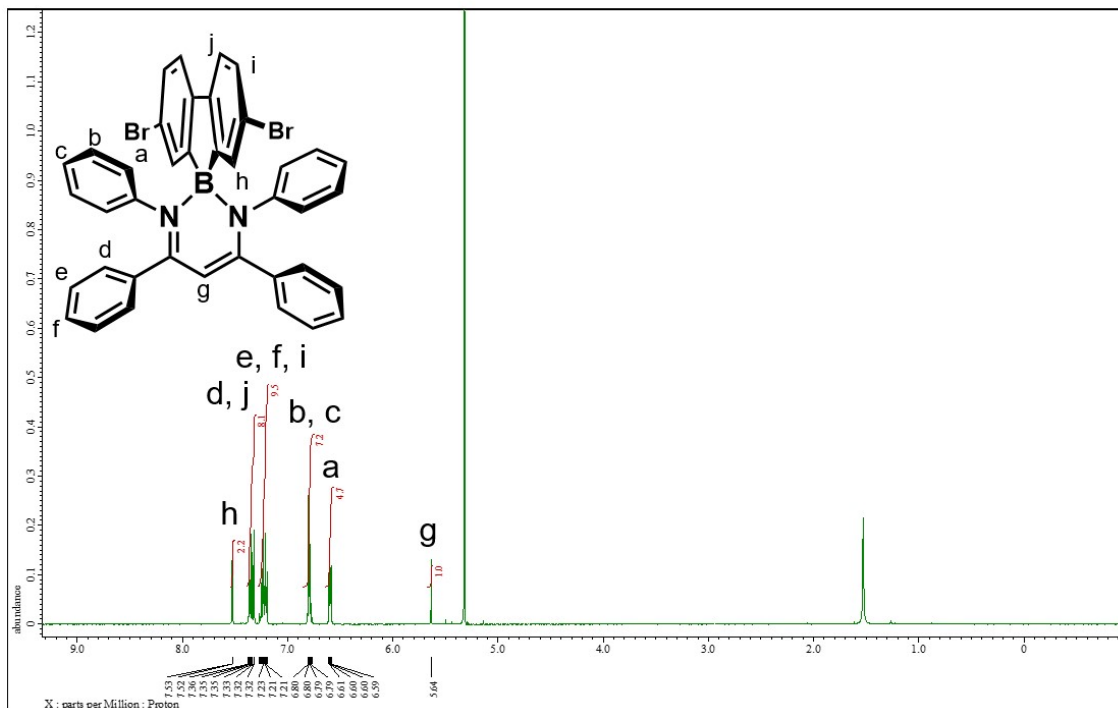

Chart S17.  $^1\text{H}$  NMR spectrum of **Ph\_FLBr** in  $\text{CD}_2\text{Cl}_2$ .

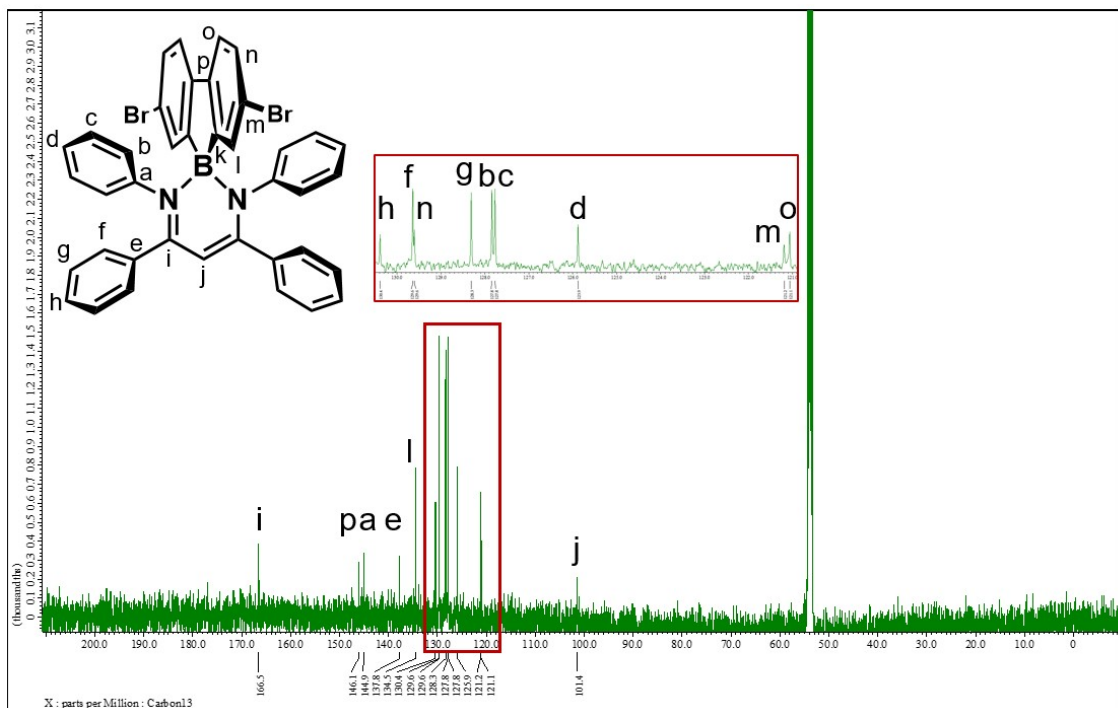

Chart S18.  $^{13}\text{C}\{^1\text{H}\}$  NMR spectrum of **Ph\_FLBr** in  $\text{CD}_2\text{Cl}_2$ .

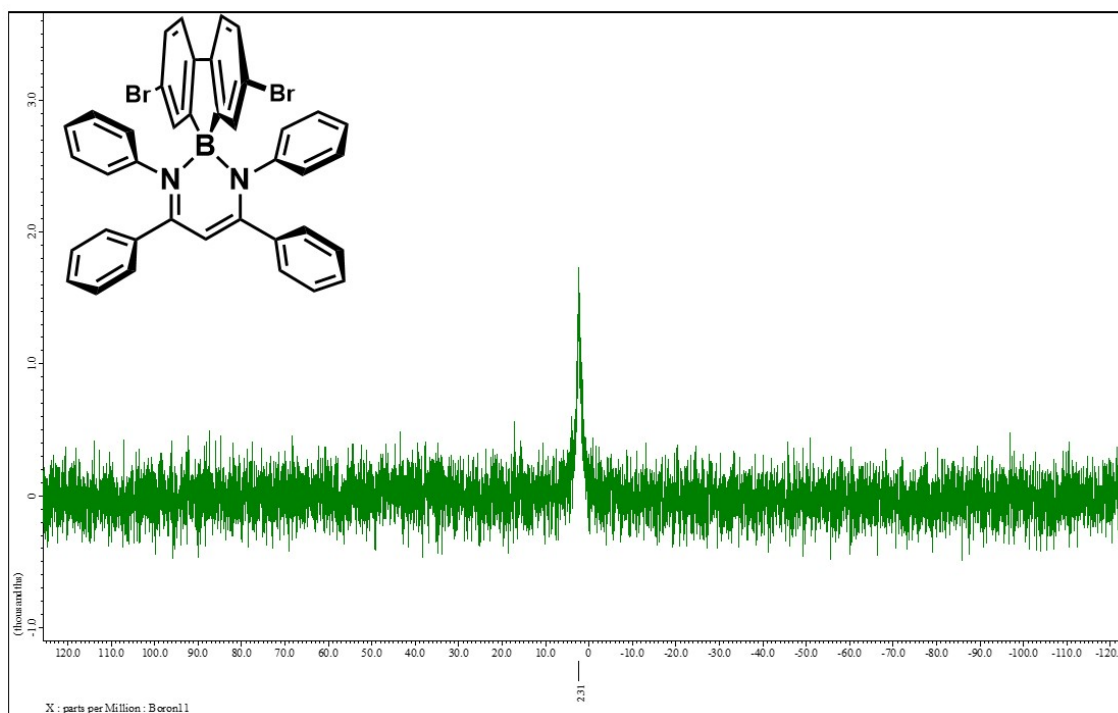

**Chart S19.**  $^{11}\text{B}\{^1\text{H}\}$  NMR spectrum of **Ph\_FLBr** in  $\text{CD}_2\text{Cl}_2$ .

## 8. References

- 1 R. Yoshii, A. Hirose, K. Tanaka and Y. Chujo, *Chem. Eur. J.*, 2014, **20**, 8320–8324.
- 2 R. Yoshii, A. Hirose, K. Tanaka and Y. Chujo, *J. Am. Chem. Soc.*, 2014, **136**, 18131–18139.
- 3 T. van Dijk, S. Burck, M. K. Rong, A. J. Rosenthal, M. Nieger, C. J. Slootweg and K. Lammertsma, *Angew. Chem. Int. Ed.*, 2014, **53**, 9068–9071.
- 4 M. J. Frisch, G. W. Trucks, H. B. Schlegel, G. E. Scuseria, M. A. Robb, J. R. Cheeseman, G. Scalmani, V. Barone, G. A. Petersson, H. Nakatsuji, X. Li, M. Caricato, A. V. Marenich, J. Bloino, B. G. Janesko, R. Gomperts, B. Mennucci, H. P. Hratchian, J. V. Ortiz, A. F. Izmaylov, J. L. Sonnenberg, D. Williams-Young, F. Ding, F. Lipparini, F. Egidi, J. Goings, B. Peng, A. Petrone, T. Henderson, D. Ranasinghe, V. G. Zakrzewski, J. Gao, N. Rega, G. Zheng, W. Liang, M. Hada, M. Ehara, K. Toyota, R. Fukuda, J. Hasegawa, M. Ishida, T. Nakajima, Y. Honda, O. Kitao, H. Nakai, T. Vreven, K. Throssell, J. A. Montgomery, Jr., J. E. Peralta, F. Ogliaro, M. J. Bearpark, J. J. Heyd, E. N. Brothers, K. N. Kudin, V. N. Staroverov, T. A. Keith, R. Kobayashi, J. Normand, K. Raghavachari, A. P. Rendell, J. C. Burant, S. S. Iyengar, J. Tomasi, M. Cossi, J. M. Millam, M. Klene, C. Adamo, R. Cammi, J. W. Ochterski, R. L. Martin, K. Morokuma, O. Farkas, J. B. Foresman and D. J. Fox, *Gaussian 16 Rev. C.01*, Wallingford, CT, 2016.
- 5 E. Epifanovsky, A. T. B. Gilbert, X. Feng, J. Lee, Y. Mao, N. Mardirossian, P. Pokhilko, A. F. White, M. P. Coons, A. L. Dempwolff, Z. Gan, D. Hait, P. R. Horn, L. D. Jacobson, I. Kaliman, J. Kussmann, A. W. Lange, K. U. Lao, D. S. Levine, J. Liu, S. C. McKenzie, A. F. Morrison, K. D. Nanda, F. Plasser, D. R. Rehn, M. L. Vidal, Z.-Q. You, Y. Zhu, B. Alam, B. J. Albrecht, A. Aldossary, E. Alguire, J. H. Andersen, V. Athavale, D. Barton, K. Begam, A. Behn, N. Bellonzi, Y. A. Bernard, E. J. Berquist, H. G. A. Burton, A. Carreras, K. Carter-Fenk, R. Chakraborty, A. D. Chien, K. D. Closser, V. Cofer-Shabica, S. Dasgupta, M. de Wergifosse, J. Deng, M. Diedenhofen, H. Do, S. Ehlert, P.-T. Fang, S. Fatehi, Q. Feng, T. Friedhoff, J. Gayvert, Q. Ge, G. Gidofalvi, M. Goldey, J. Gomes, C. E. González-Espinoza, S. Gulania, A. O. Gunina, M. W. D. Hanson-Heine, P. H. P. Harbach, A. Hauser, M. F. Herbst, M. H. Vera, M. Hodecker, Z. C. Holden, S. Houck, X. Huang, K. Hui, B. C. Huynh, M. Ivanov, Á. Jász, H. Ji, H. Jiang, B. Kaduk, S. Kähler, K. Khistyayev, J. Kim, G. Kis, P. Klunzinger, Z. Koczor-

Benda, J. H. Koh, D. Kosenkov, L. Koulias, T. Kowalczyk, C. M. Krauter, K. Kue, A. Kunitsa, T. Kus, I. Ladjánszki, A. Landau, K. V. Lawler, D. Lefrancois, S. Lehtola, R. R. Li, Y.-P. Li, J. Liang, M. Liebenthal, H.-H. Lin, Y.-S. Lin, F. Liu, K.-Y. Liu, M. Loipersberger, A. Luenser, A. Manjanath, P. Manohar, E. Mansoor, S. F. Manzer, S.-P. Mao, A. V. Marenich, T. Markovich, S. Mason, S. A. Maurer, P. F. McLaughlin, M. F. S. J. Menger, J.-M. Mewes, S. A. Mewes, P. Morgante, J. W. Mullinax, K. J. Oosterbaan, G. Paran, A. C. Paul, S. K. Paul, F. Pavošević, Z. Pei, S. Prager, E. I. Proynov, Á. Rák, E. Ramos-Cordoba, B. Rana, A. E. Rask, A. Rettig, R. M. Richard, F. Rob, E. Rossomme, T. Scheele, M. Scheurer, M. Schneider, N. Sergueev, S. M. Sharada, W. Skomorowski, D. W. Small, C. J. Stein, Y.-C. Su, E. J. Sundstrom, Z. Tao, J. Thirman, G. J. Tornai, T. Tsuchimochi, N. M. Tubman, S. P. Veccham, O. Vydrov, J. Wenzel, J. Witte, A. Yamada, K. Yao, S. Yeganeh, S. R. Yost, A. Zech, I. Y. Zhang, X. Zhang, Y. Zhang, D. Zuev, A. Aspuru-Guzik, A. T. Bell, N. A. Besley, K. B. Bravaya, B. R. Brooks, D. Casanova, J.-D. Chai, S. Coriani, C. J. Cramer, G. Cserey, A. E. DePrince, R. A. DiStasio, A. Dreuw, B. D. Dunietz, T. R. Furlani, W. A. Goddard, S. Hammes-Schiffer, T. Head-Gordon, W. J. Hehre, C.-P. Hsu, T.-C. Jagau, Y. Jung, A. Klamt, J. Kong, D. S. Lambrecht, W. Liang, N. J. Mayhall, C. W. McCurdy, J. B. Neaton, C. Ochsenfeld, J. A. Parkhill, R. Peverati, V. A. Rassolov, Y. Shao, L. V. Slipchenko, T. Stauch, R. P. Steele, J. E. Subotnik, A. J. W. Thom, A. Tkatchenko, D. G. Truhlar, T. V. Voorhis, T. A. Wesolowski, K. B. Whaley, H. L. Woodcock, P. M. Zimmerman, S. Faraji, P. M. W. Gill, M. Head-Gordon, J. M. Herbert and A. I. Krylov, *J. Chem. Phys.*, 2021, **155**, 084801.
